# Supplementary material for: Transcriptome analysis of human ageing in male skin shows mid-life period of variability and central role of NF-κB
Source: PubMed Central journal article supplement (PMC4882522; doi:10.1038/srep26846), 2016-05-27
Supplement: srep26846-s1.pdf [file srep26846-s1.pdf]

**Transcriptome analysis of human ageing in male skin shows mid-life period of variability and central role of NF- $\kappa$ B**

Daniel J. Haustead<sup>1,2,3</sup> Andrew Stevenson<sup>1,4</sup> Vishal Saxena<sup>5</sup>, Fiona Marriage<sup>3</sup>, Martin Firth<sup>2</sup>, Robyn Silla<sup>1,6</sup>, Lisa Martin<sup>1,6</sup>, Katharine F. Adcroft<sup>1,4</sup>, Suzanne Rea<sup>1,4,6</sup>, Philip J. Day<sup>3</sup>, Philip E. Melton<sup>7</sup>, Fiona M. Wood<sup>1,2,4,6</sup>, Mark W. Fear\*<sup>1,4</sup>

*<sup>1</sup>The Fiona Wood Foundation, Perth, WA, Australia 6000. <sup>2</sup>Faculty of Medicine, Dentistry and Health Sciences, University of Western Australia, Crawley WA, Australia 6009. <sup>3</sup>Faculty of Medicine and Health Sciences, University of Manchester, Manchester, UK, M1 7DN. <sup>4</sup>Burn Injury Research Unit, School of Surgery, University of Western Australia, Crawley WA, Australia 6009. <sup>5</sup>Department of Mechanical Engineering, Massachusetts Institute of Technology, Cambridge, Massachusetts, USA 02139. <sup>6</sup>Burns Service of Western Australia, Royal Perth Hospital and Princess Margaret Hospital, WA, Australia 6000. <sup>7</sup>Centre for genetic origins of health and disease, University of Western Australia, Crawley, WA, Australia, 6009*

**a**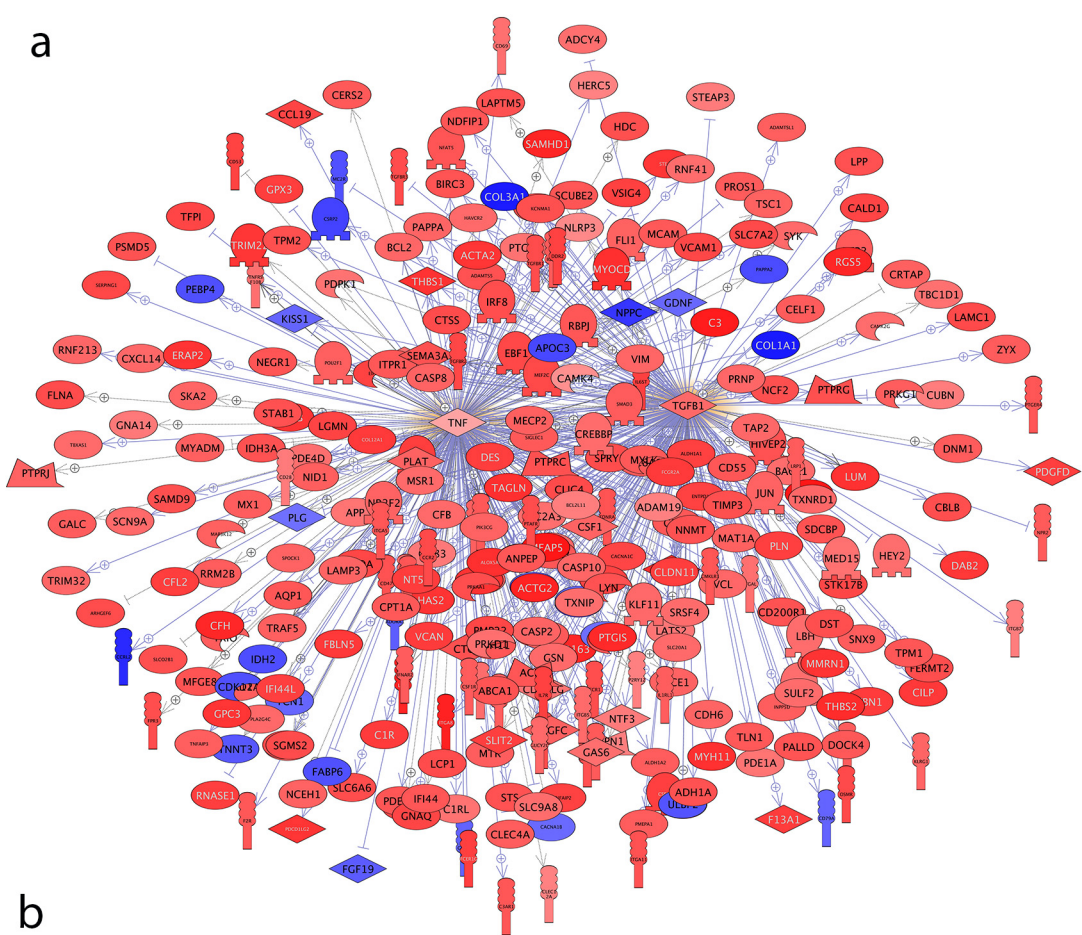**b**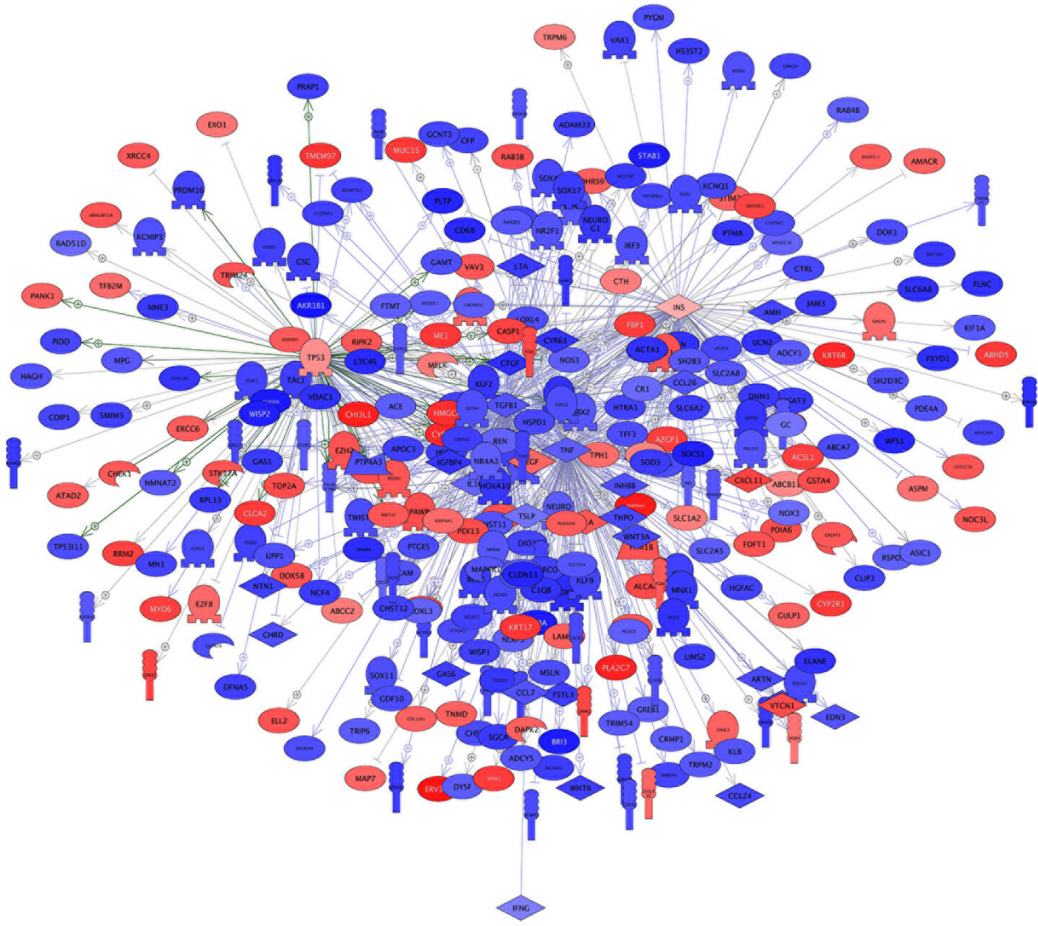

## **Figure S1**

**a** Pathway showing common regulators with >100 interacting proteins in the pathway list for the eldest versus youngest age groups comparison.

**b** Pathway showing common regulators with >100 interacting proteins in the pathway list for the 30-45 age group versus all other age groups.

Red indicates increased gene expression, blue indicates decreased gene expression in the eldest (a) and mid-life (b) groups compared to other age groups.

Color Key

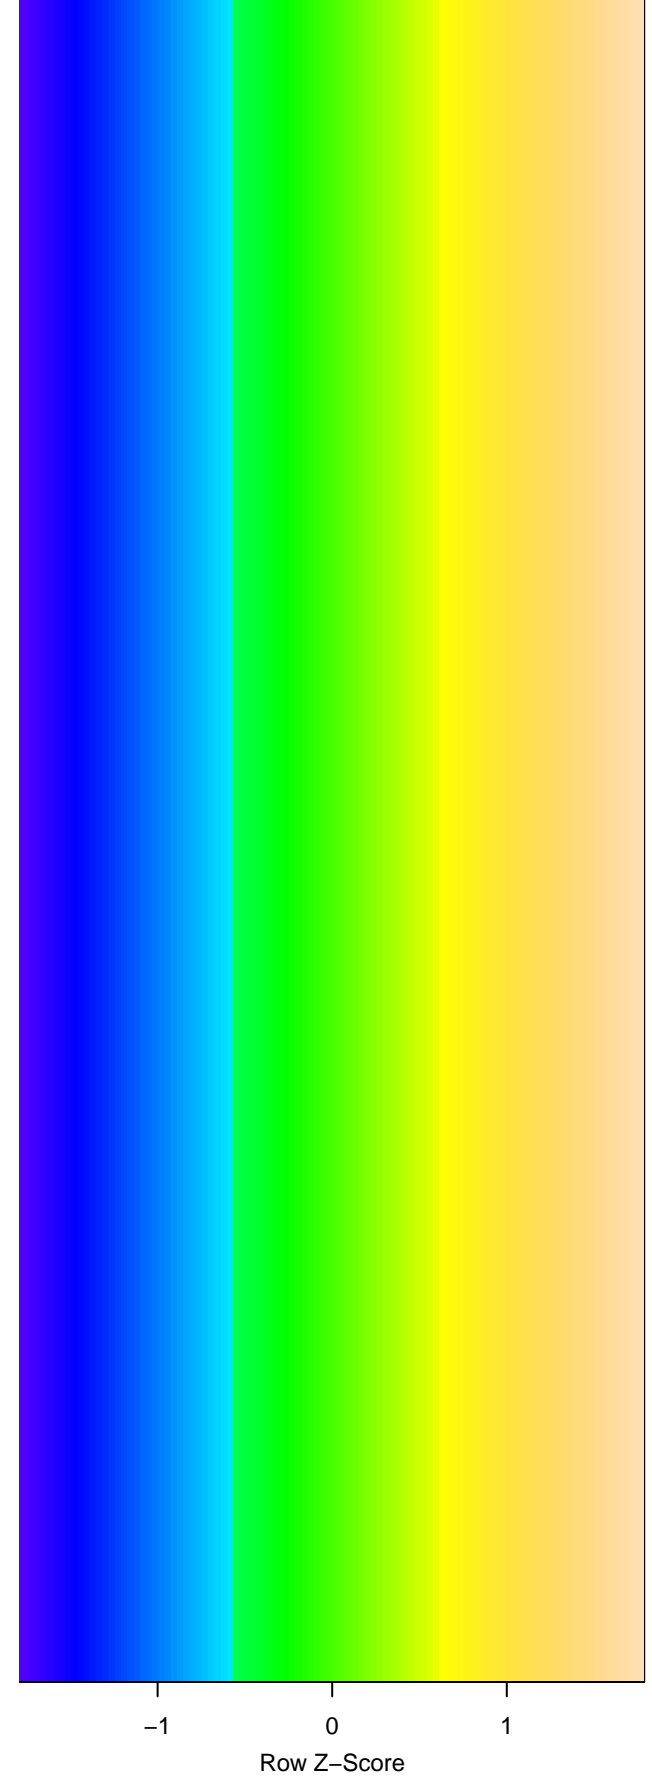

-1 0 1  
Row Z-Score

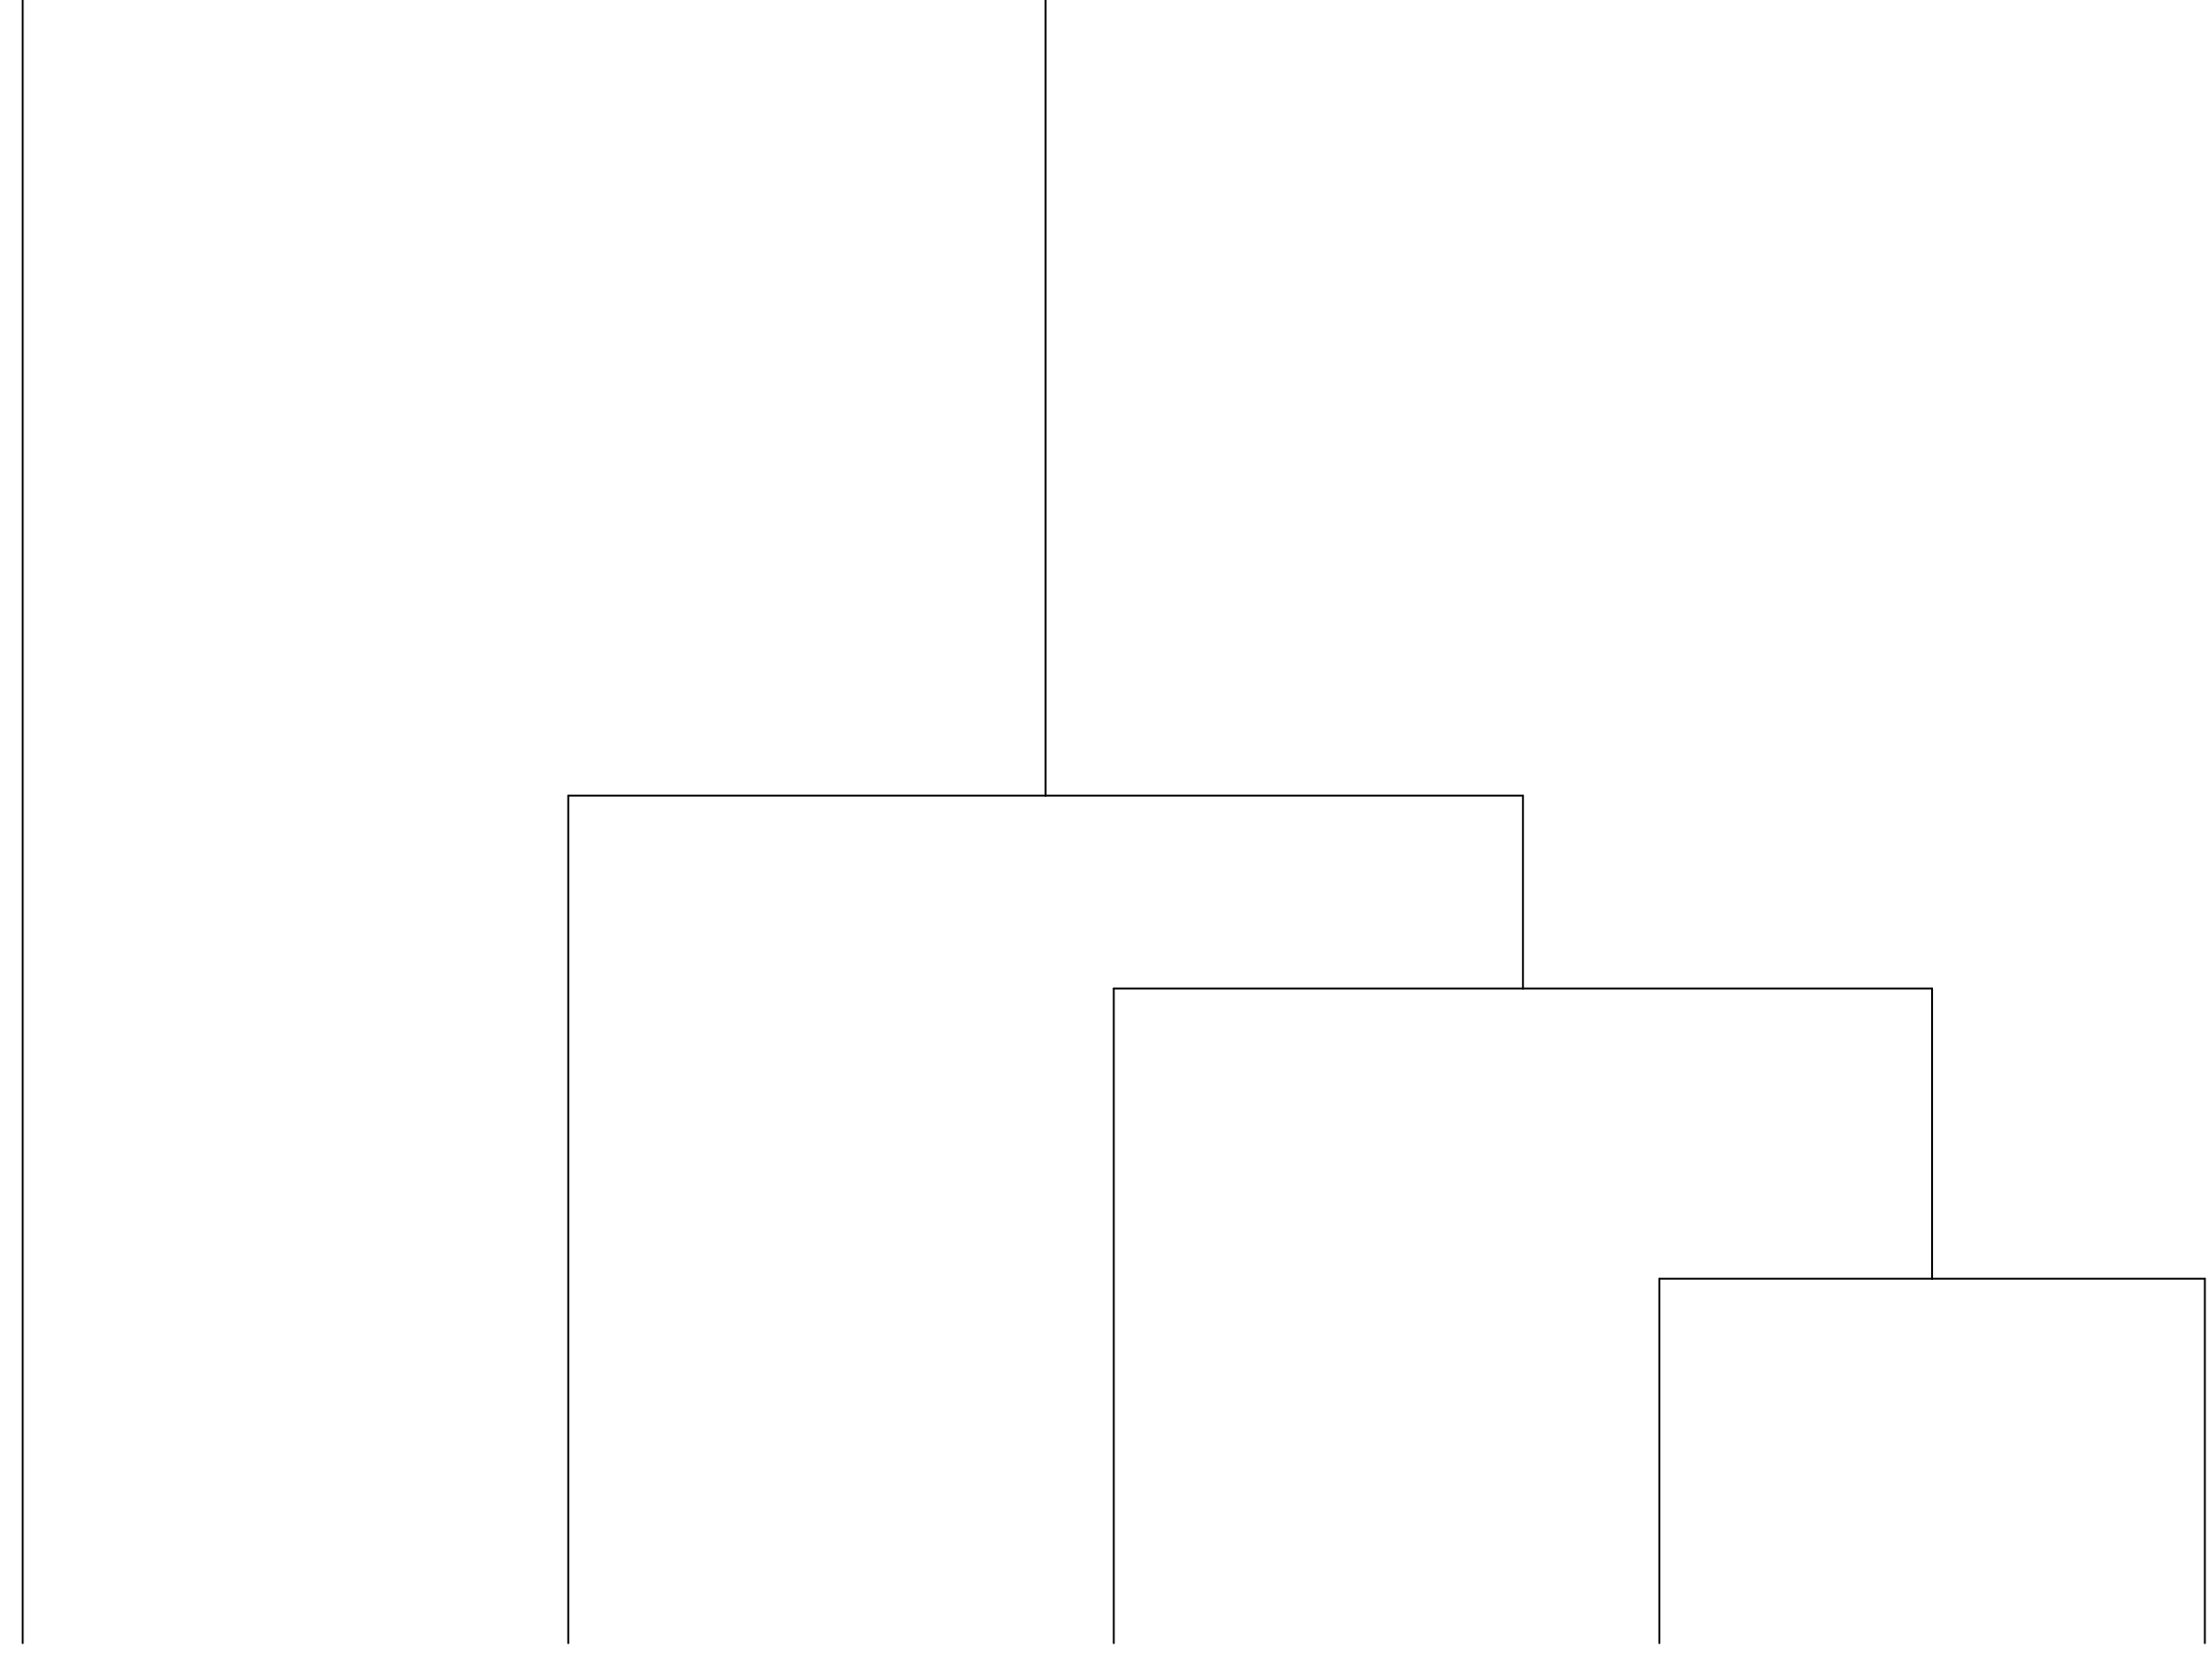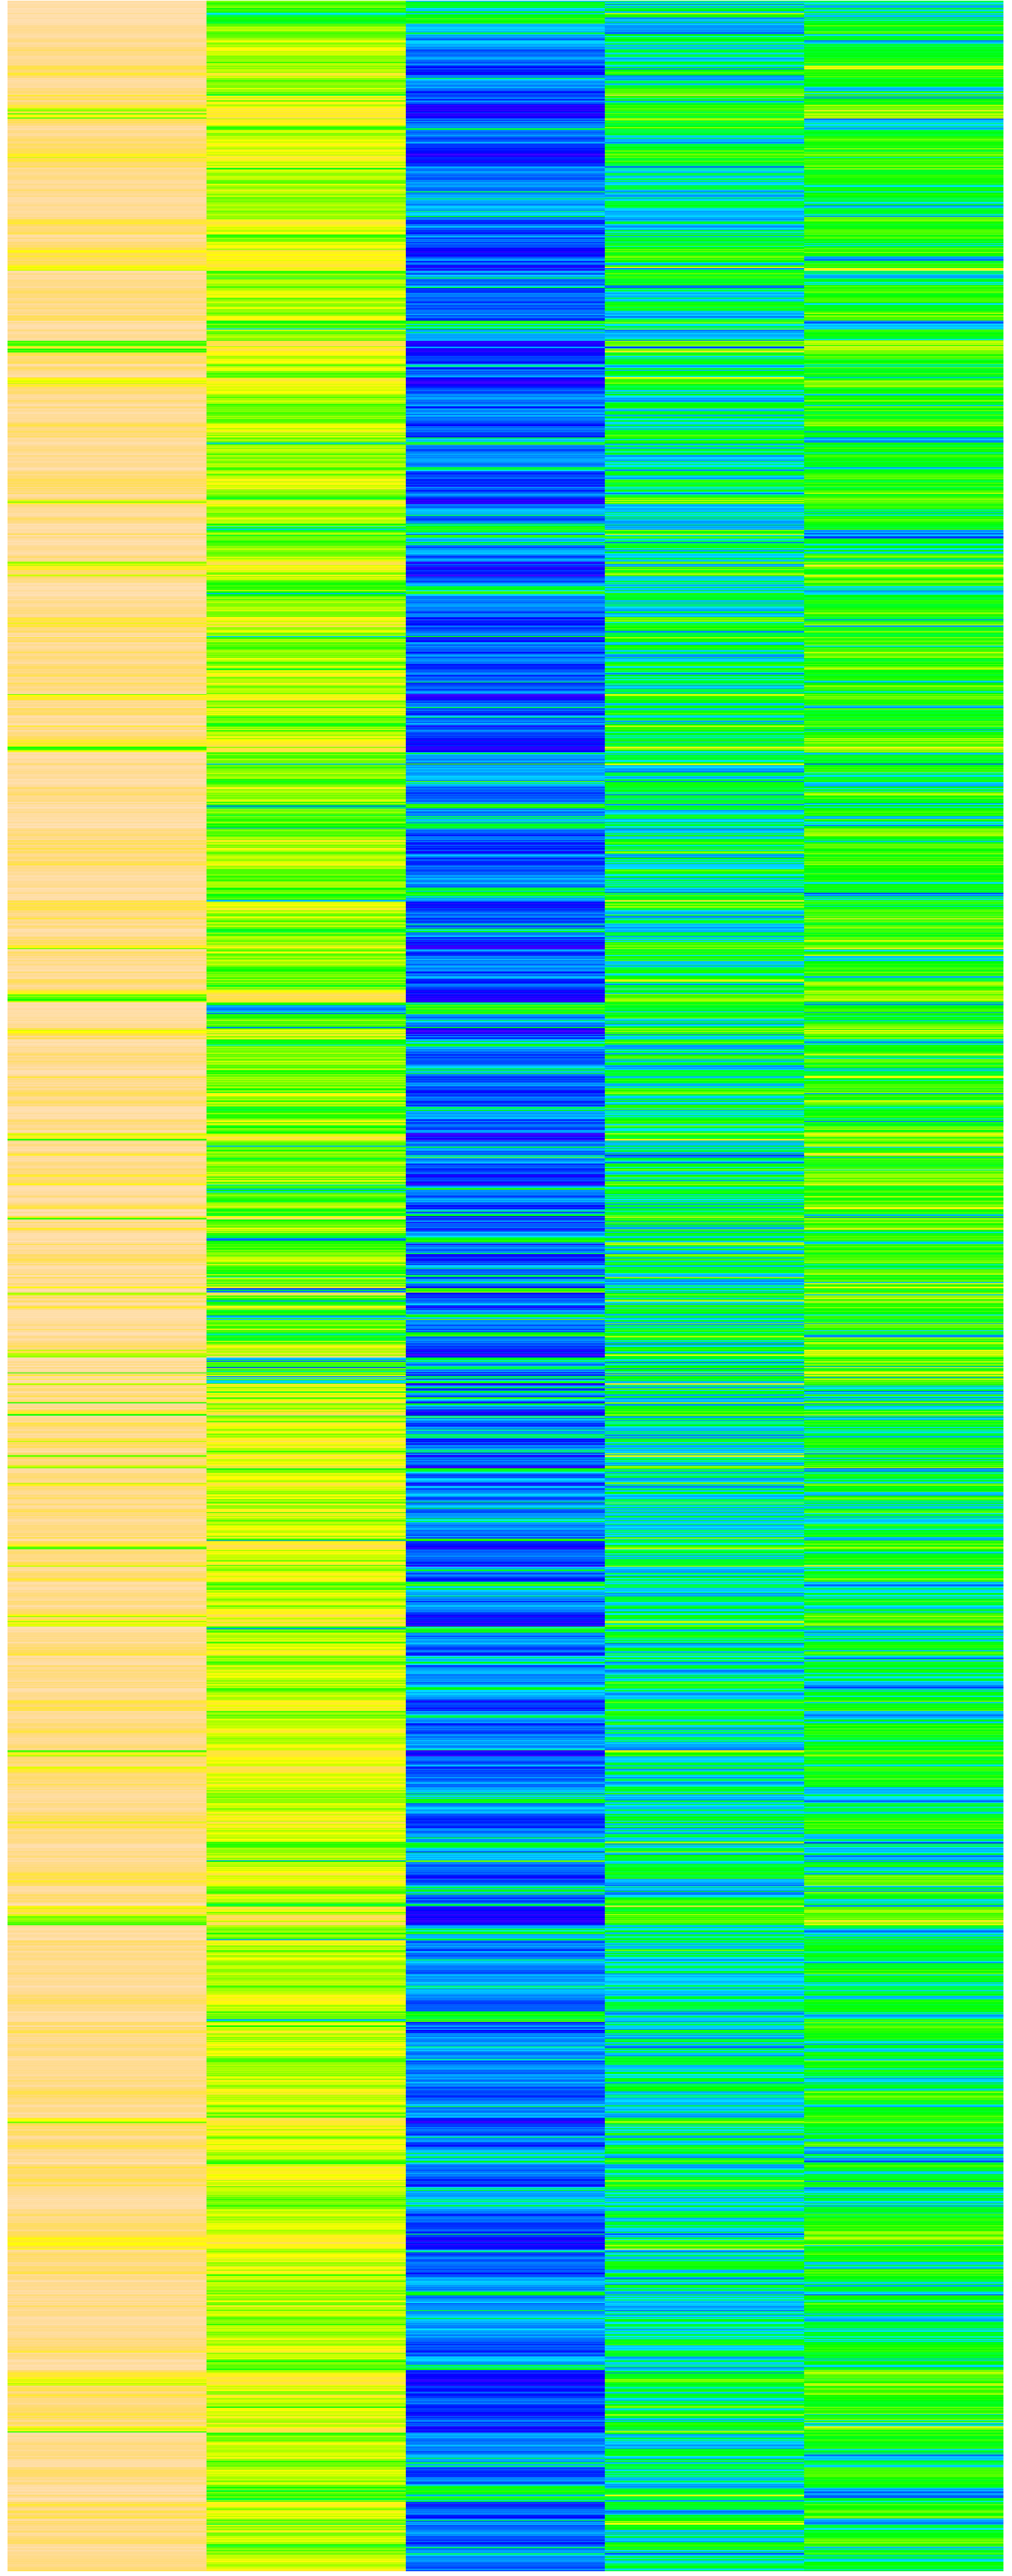

92

95

91

93

94



## **Figure S2**

**a** Heatmap of genes upregulated in the 30-45 age group compared to other age groups shown as a group comparison

**b** Heatmap of genes downregulated in the 30-45 age group compared to other age groups shown as a group comparison

g1 18-29, g2 30-45, g3 46-60, g4 61-75, g5 >75 age groups.

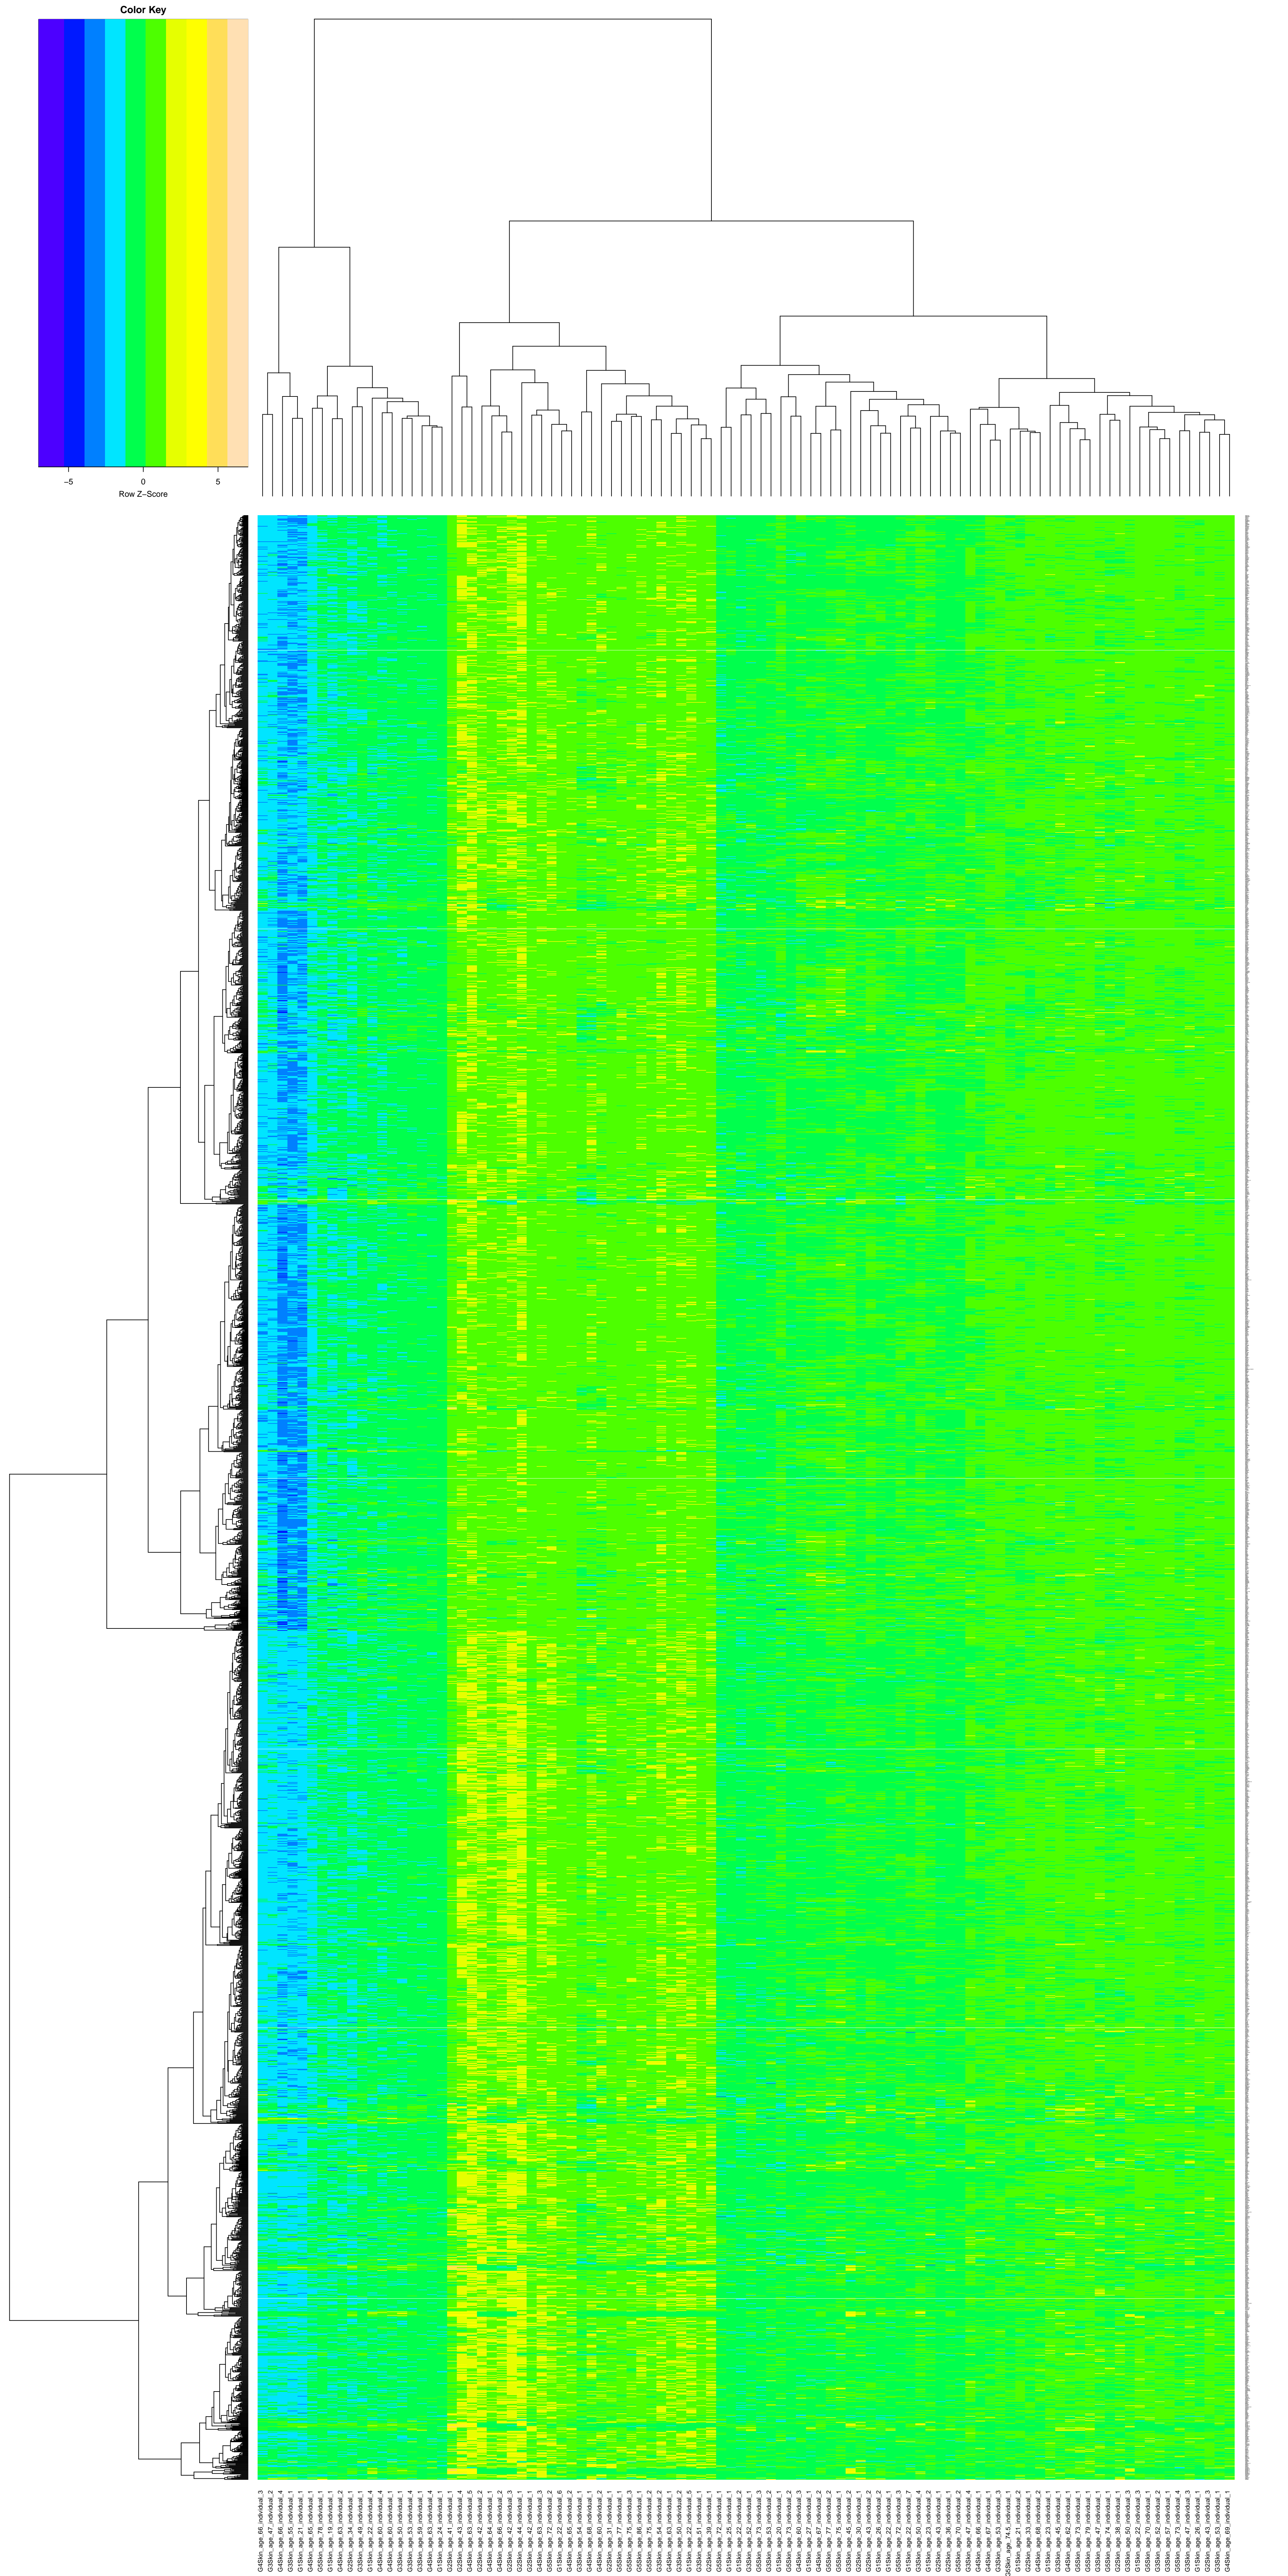

Color Key

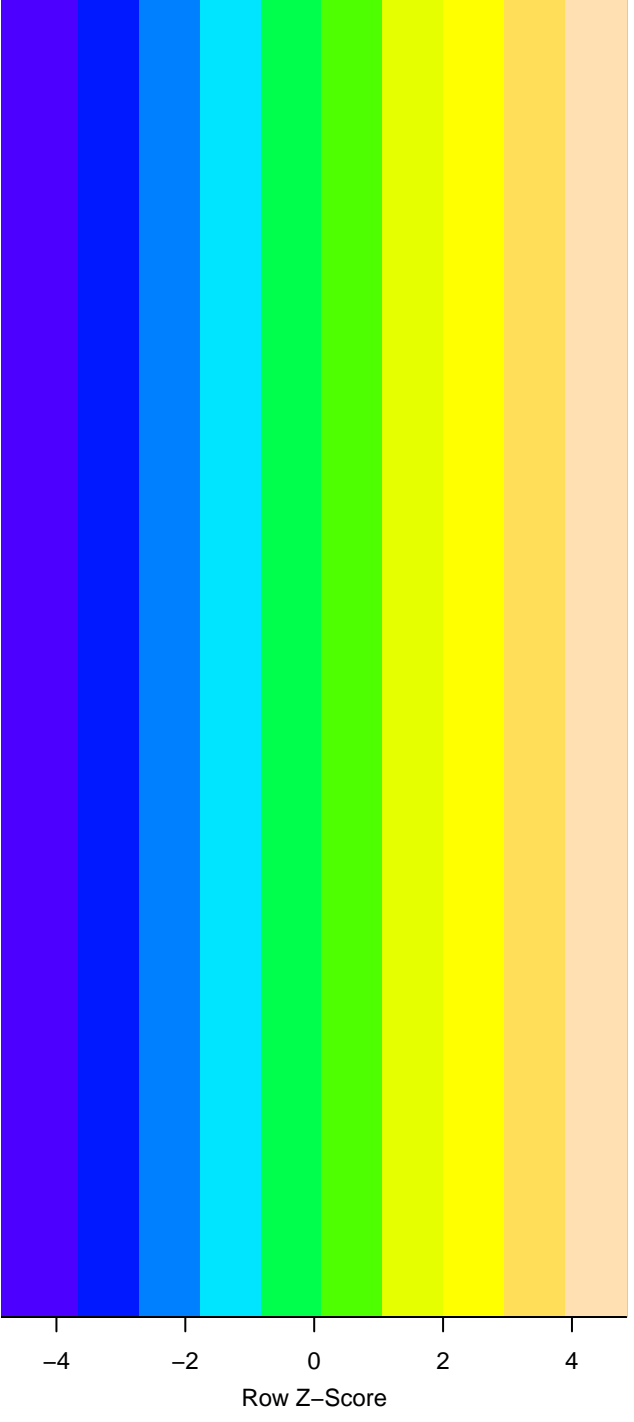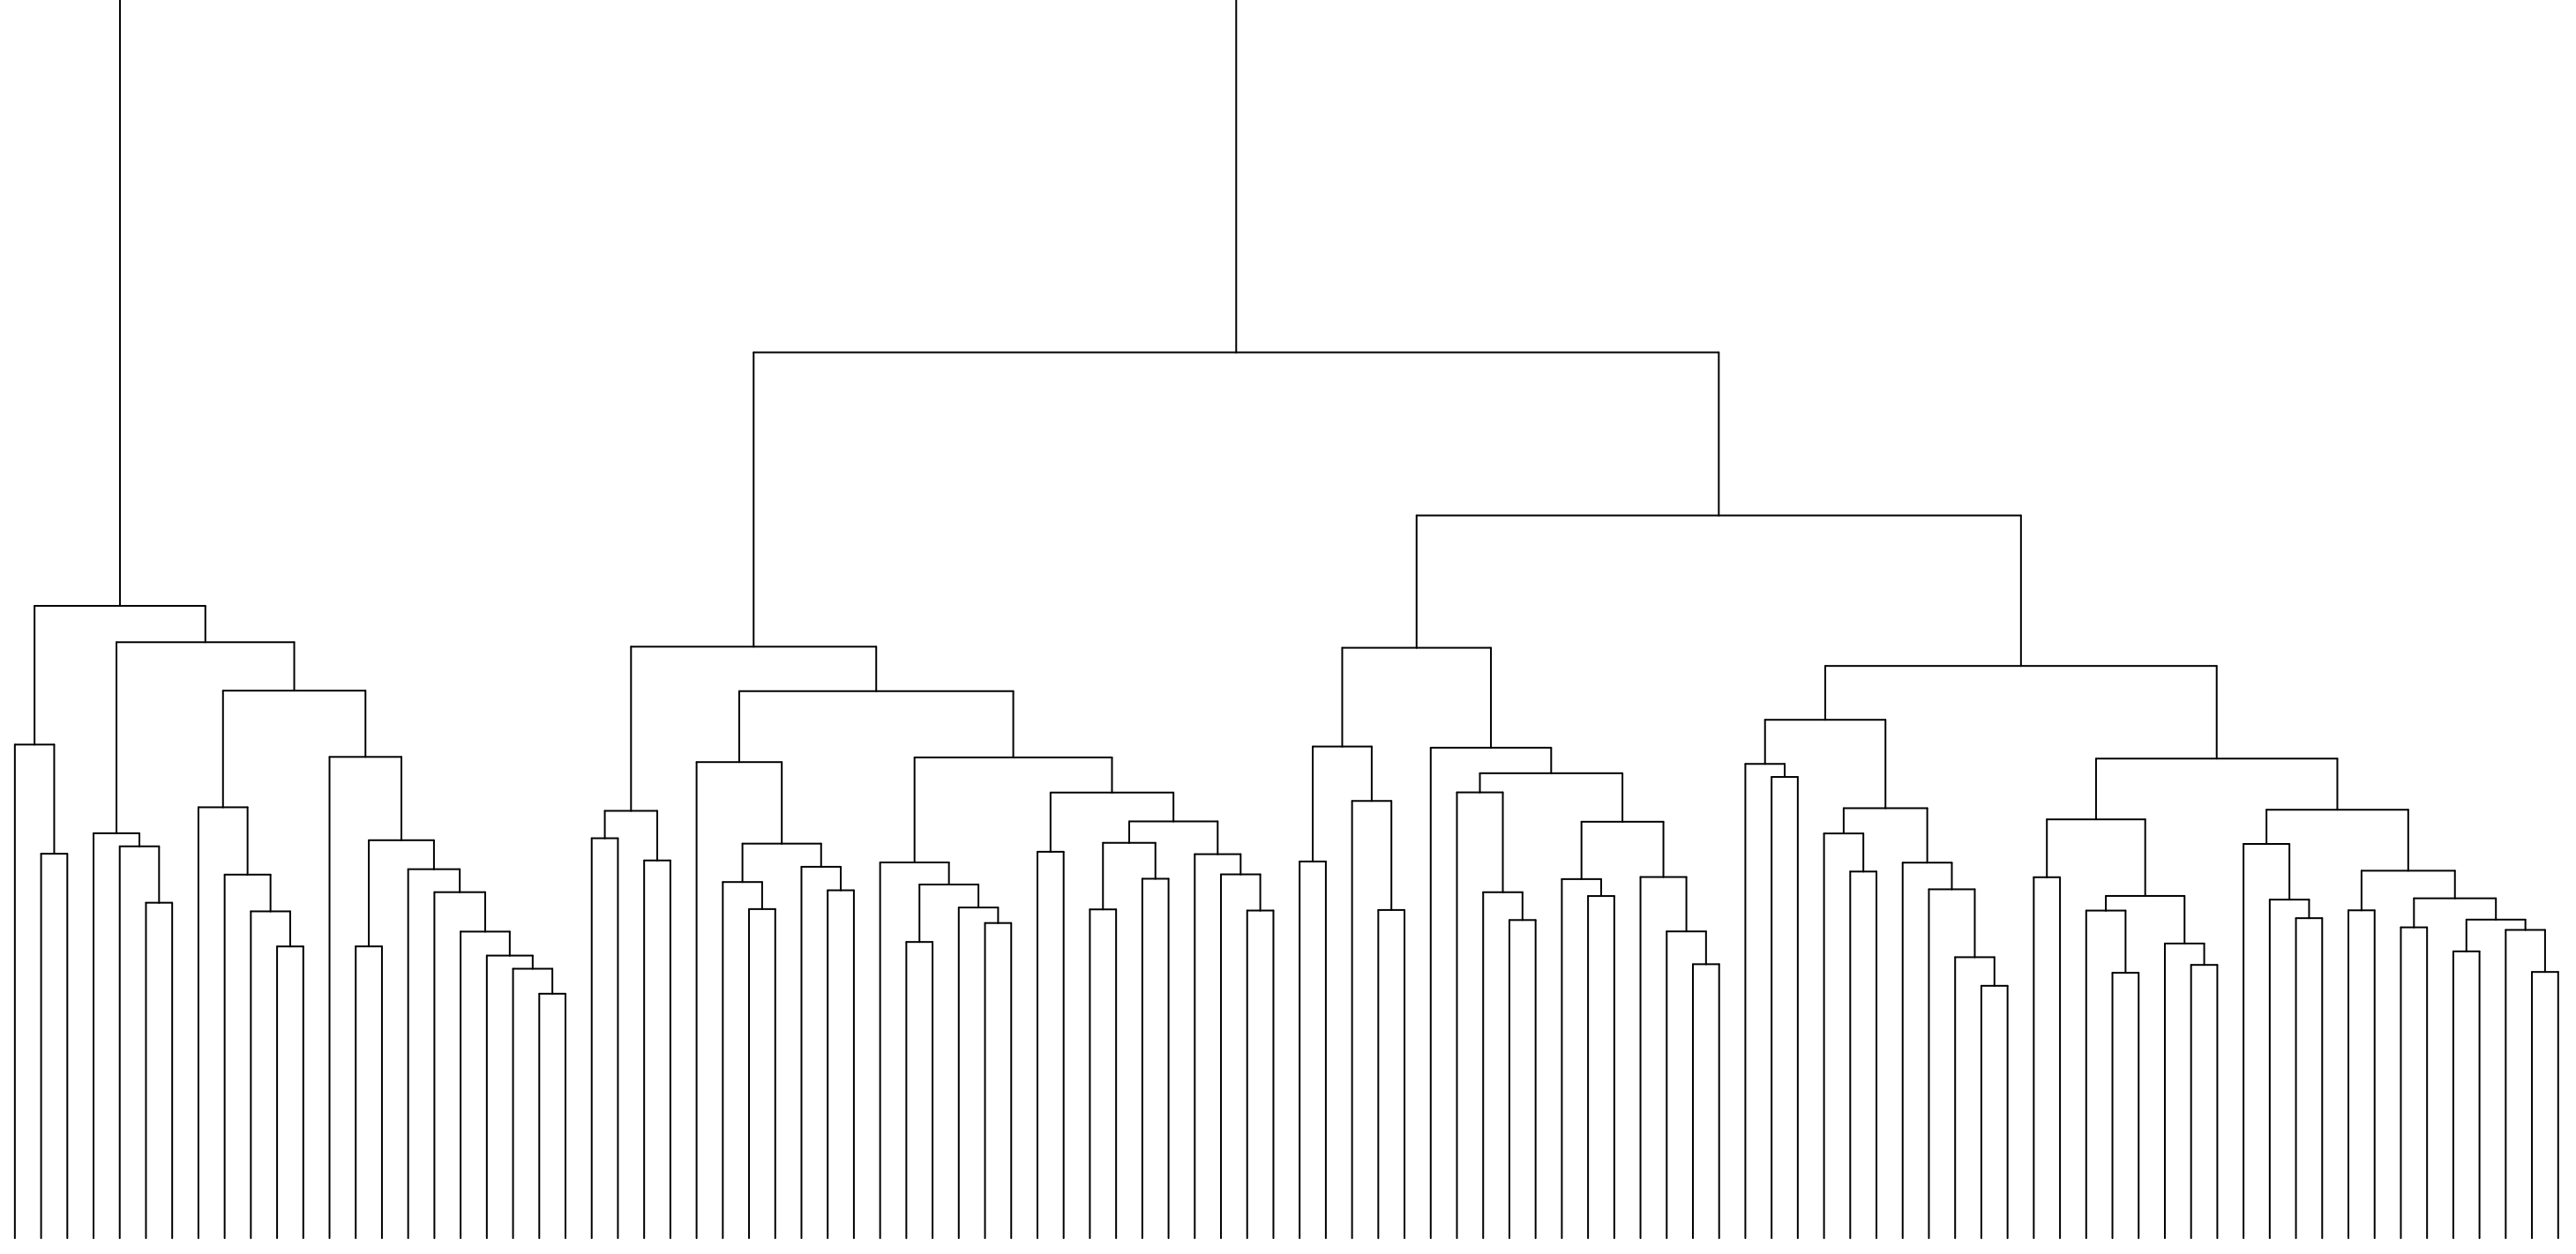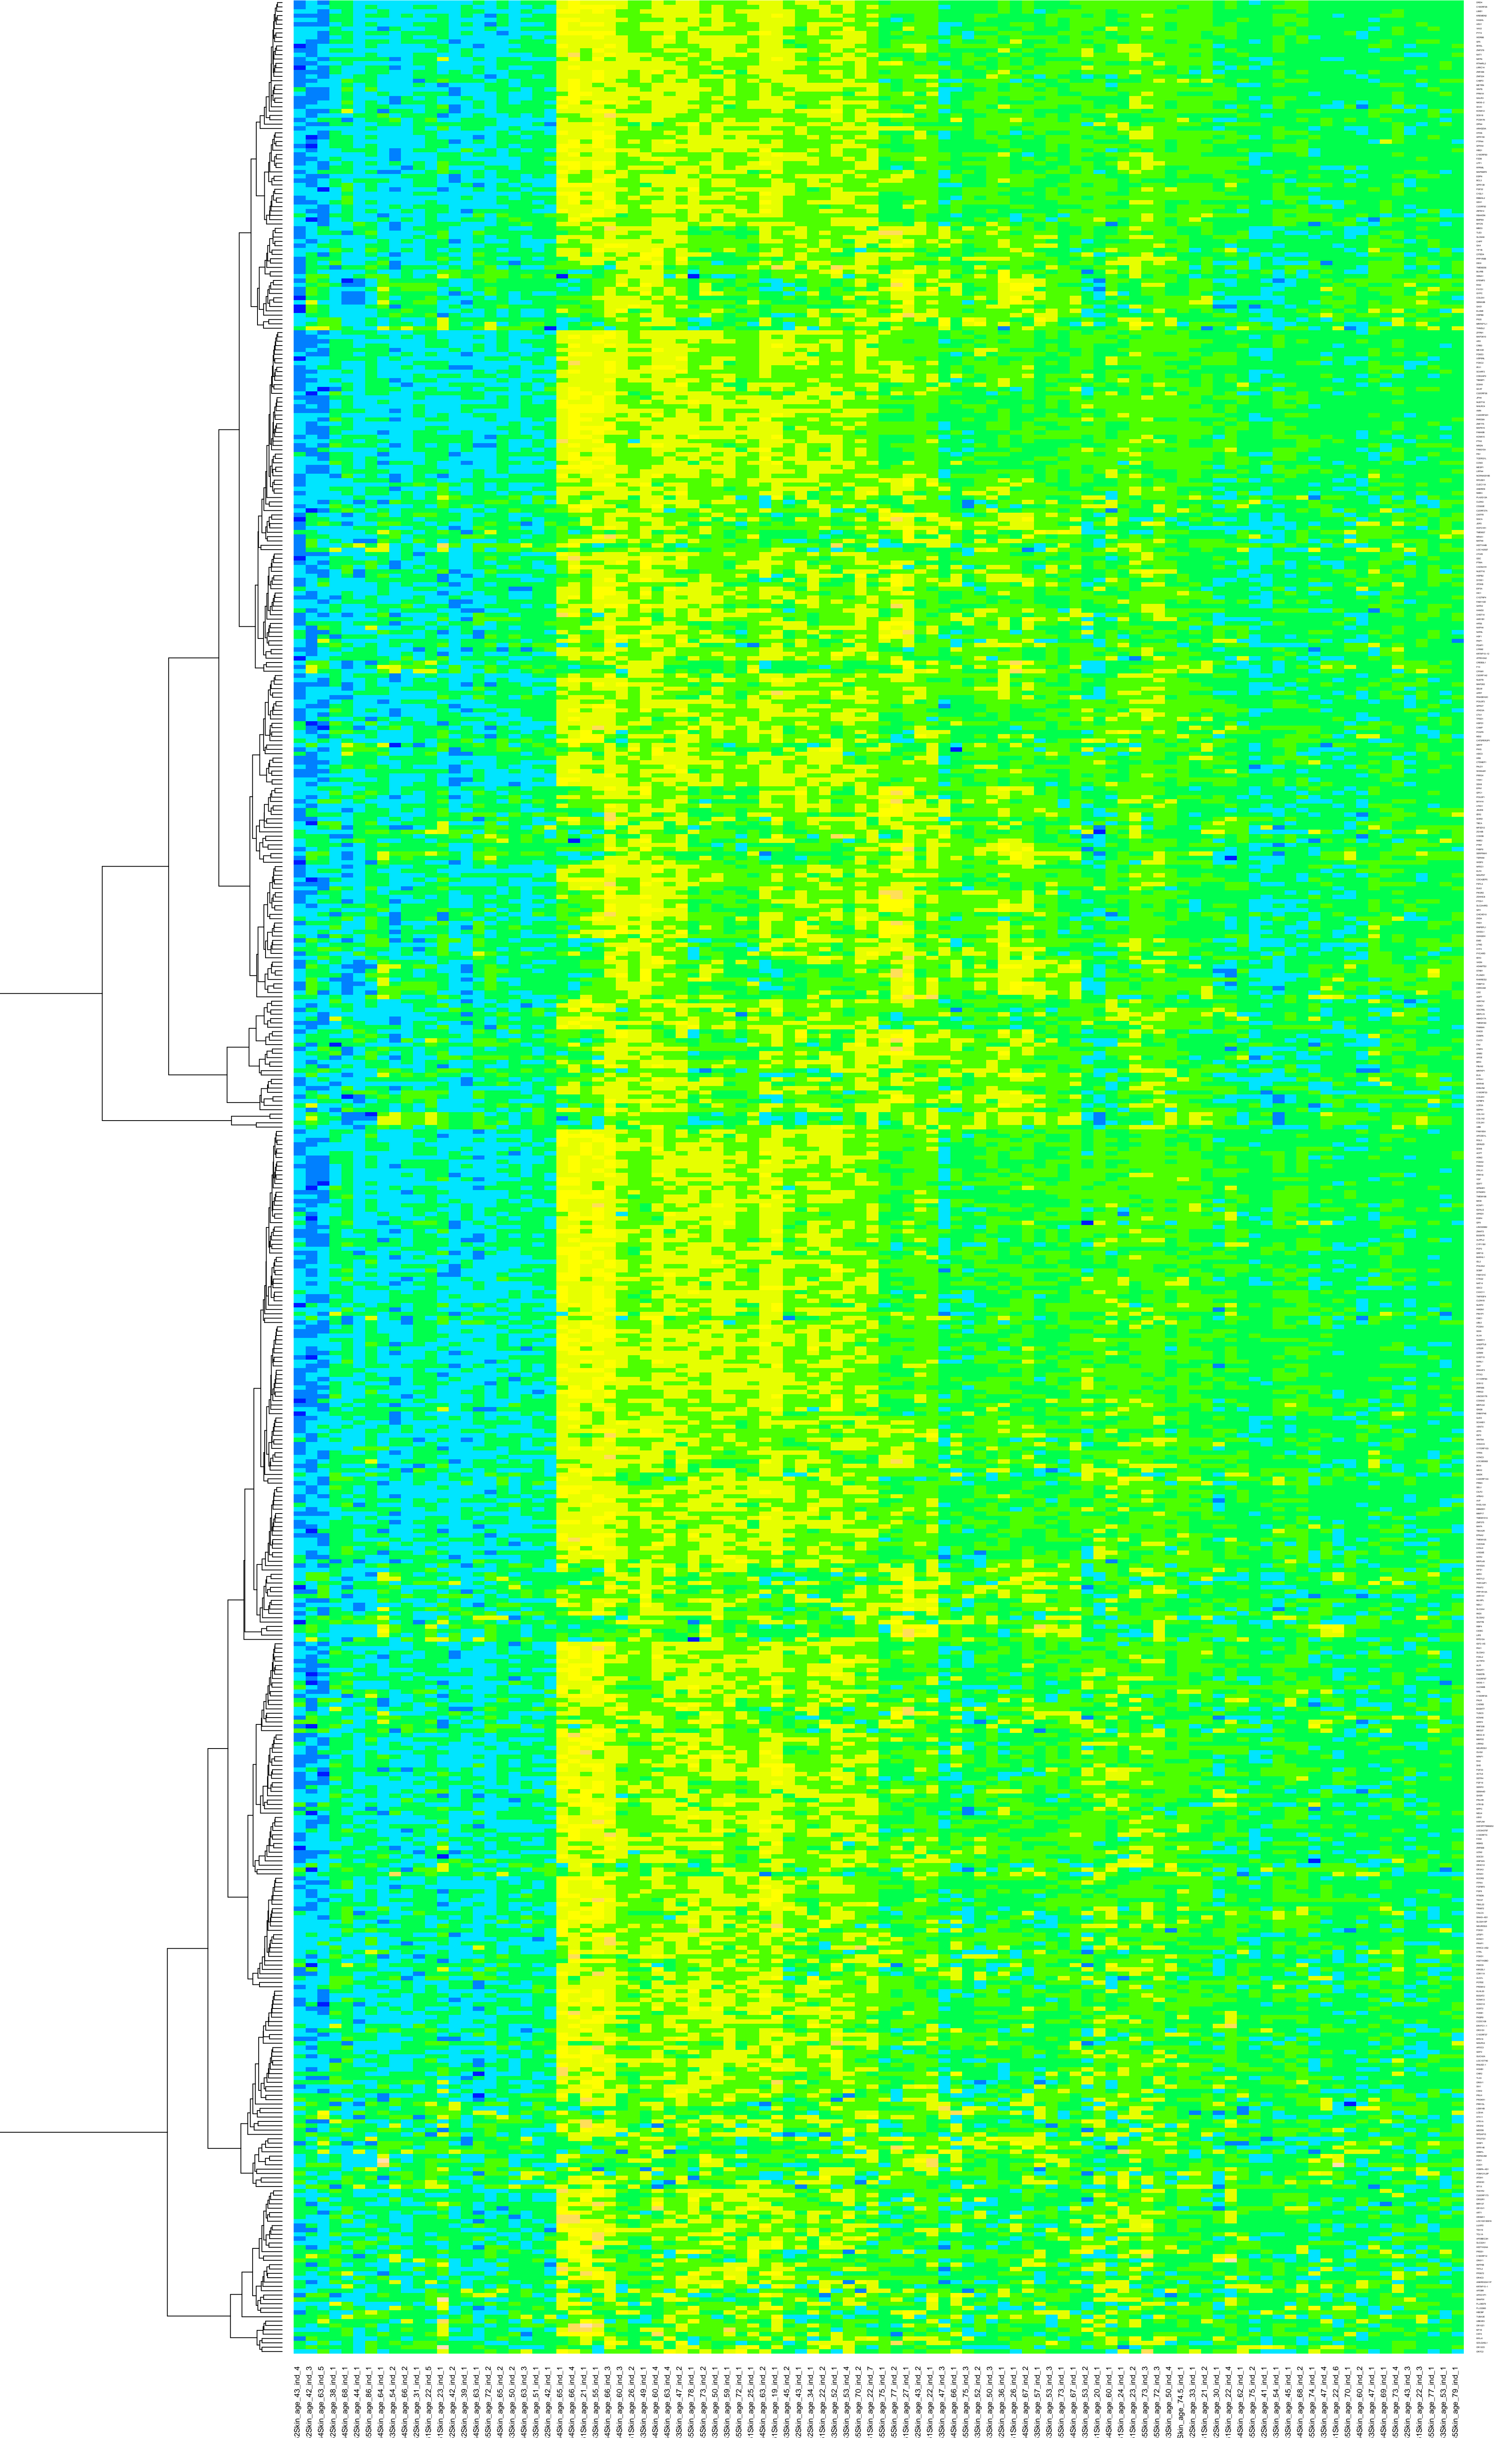



### **Figure S3**

**a** Heatmap of genes upregulated in the 30-45 age group compared to other age groups showing individual samples.

**b** Heatmap of genes downregulated in the 30-45 age group compared to other age groups showing individual samples.

| Age | Yrs in Aus | Past Med Hx        | Medications               | Cur Smoker | Years post quitting | Amount smoked (pack years) | Fam Hx Skin Ca    |
|-----|------------|--------------------|---------------------------|------------|---------------------|----------------------------|-------------------|
| 19  | 13         | No                 | Nil                       | No         | NA                  | NA                         | Nil               |
| 20  | 20         | No                 | Nil                       | No         | NA                  | NA                         | Nil               |
| 21  | 21         | Hayfever/Allergies | Nil                       | No         | NA                  | NA                         | Nil               |
| 21  | 21         | No                 | Nil                       | No         | NA                  | NA                         | Nil               |
| 22  | 22         | No                 | Nil                       | No         | NA                  | NA                         | Nil               |
| 22  | 22         | No                 | Nil                       | No         | NA                  | NA                         | Nil               |
| 22  | 20         | No                 | Nil                       | No         | NA                  | NA                         | Nil               |
| 22  | 22         | No                 | Nil                       | No         | NA                  | NA                         | Nil               |
| 22  | 22         | Migraines          | Nil                       | No         | NA                  | NA                         | Nil               |
| 22  | 22         | migraines          | Nil                       | No         | NA                  | NA                         | Nil               |
| 22  | 20         | No                 | Nil                       | No         | NA                  | NA                         | Nil               |
| 23  | 23         | No                 | Nil                       | No         | NA                  | NA                         | Nil               |
| 23  | 23         | No                 | Nil                       | No         | NA                  | NA                         | Nil               |
| 24  | 24         | No                 | Nil                       | No         | NA                  | NA                         | Nil               |
| 25  | 25         | No                 | Nil                       | No         | 2 years             | NA                         | Nil               |
| 26  | 26         | No                 | Nil                       | No         | NA                  | NA                         | Nil               |
| 26  | 26         | No                 | Nil                       | No         | NA                  | NA                         | Nil               |
| 27  | 27         | No                 | Nil                       | No         | NA                  | NA                         | Nil               |
| 30  | 30         | Asthma             | Formoterol,<br>Budesonide | No         | NA                  | NA                         | Nil               |
| 31  | 31         | No                 | Nil                       | No         | NA                  | NA                         | Nil               |
| 33  | 33         | Deaf in right ear  | Nil                       | No         | NA                  | NA                         | Nil               |
| 34  | 34         | No                 | Nil                       | No         | NA                  | NA                         | Father-<br>benign |
| 36  | 36         | No                 | Nil                       | No         | NA                  | NA                         | Nil               |
| 38  | 38         | No                 | Nil                       | No         | NA                  | NA                         | Nil               |
| 39  | 39         | Hypertension       | Nil                       | No         | 6 years             | 1                          | Nil               |
| 41  | 30         | No                 | Nil                       | No         | NA                  | NA                         | Nil               |
| 42  | 21         | No                 | Nil                       | No         | NA                  | NA                         | Nil               |
| 42  | 42         | No                 | Nil                       | No         | 2 years             | 3                          | Nil               |
| 42  | 42         | No                 | Nil                       | No         | NA                  | NA                         | Nil               |
| 43  | 43         | No                 | Nil                       | No         | NA                  | NA                         | Nil               |
| 43  | 43         | No                 | Nil                       | No         | NA                  | NA                         | Nil               |
| 43  | 43         | No                 | Nil                       | No         | NA                  | NA                         | Nil               |
| 43  | 43         | No                 | Nil                       | No         | NA                  | NA                         | Nil               |
| 44  | 20         | No                 | Nil                       | No         | NA                  | NA                         | Nil               |
| 45  | 45         | No                 | Steroid<br>Creams         | No         | NA                  | NA                         | Nil               |
| 45  | 45         | No                 | Nil                       | No         | NA                  | NA                         | Nil               |
| 47  | 8          | No                 | Nil                       | No         | 7 years             | NA                         | Mother-<br>benign |
| 47  | 47         | No                 | Nil                       | No         | NA                  | NA                         | Nil               |

|    |    |                                                                               |                                |    |          |    |               |
|----|----|-------------------------------------------------------------------------------|--------------------------------|----|----------|----|---------------|
| 47 | 34 | No                                                                            | Multi vitamins                 | No | NA       | NA | Nil           |
| 47 | 47 | GORD                                                                          | Nil                            | No | NA       | NA | Nil           |
| 49 | 30 | No                                                                            | Nil                            | No | NA       | NA | Nil           |
| 50 | 50 | No                                                                            | Fish oils                      | No | 30 years | 12 | Father-benign |
| 50 | 50 | No                                                                            | Nil                            | No | 35 years | NA | Nil           |
| 50 | 20 | No                                                                            | Nil                            | No | NA       | NA | Nil           |
| 50 | 18 | No                                                                            | Nil                            | No | NA       | NA | Nil           |
| 51 | 51 | No                                                                            | Nil                            | No | 23 years | NA | Nil           |
| 52 | 52 | No                                                                            | Nil                            | No | NA       | NA | Mother        |
| 52 | 15 | No                                                                            | Nil                            | No | NA       | NA | Nil           |
| 53 | 53 | No                                                                            | Nil                            | No | 20 years | 5  | Father-benign |
| 53 | 53 | No                                                                            | Multi vitamins                 | No | NA       | NA | Nil           |
| 53 | 25 | No                                                                            | Nil                            | No | NA       | NA | Nil           |
| 53 | 53 | No                                                                            | Nil                            | No | NA       | NA | Nil           |
| 54 | 54 | No                                                                            | Multi vitamins                 | No | 30 years | NA | Nil           |
| 54 | 54 | No                                                                            | Nil                            | No | NA       | NA | Nil           |
| 55 | 55 | No                                                                            | Nil                            | No | NA       | NA | Nil           |
| 57 | 57 | Depression                                                                    | Citalopram                     | No | 12 years | 30 | Nil           |
| 59 | 59 | No                                                                            | Nil                            | No | NA       | NA | Nil           |
| 60 | 60 | No                                                                            | Nil                            | No | NA       | NA | Father        |
| 60 | 48 | No                                                                            | Nil                            | No | 15 years | 5  | Nil           |
| 60 | 60 | No                                                                            | Nil                            | No | NA       | NA | Nil           |
| 60 | 60 | No                                                                            | Nil                            | No | NA       | NA | Nil           |
| 62 | 39 | No                                                                            | Nil                            | No | NA       | NA | Nil           |
| 63 | 63 | No                                                                            | Nil                            | No | NA       | NA | Nil           |
| 63 | 63 | No                                                                            | Nil                            | No | NA       | NA | Nil           |
| 63 | 63 | No                                                                            | Nil                            | No | 20 years | <1 | Nil           |
| 63 | 24 | No                                                                            | Nil                            | No | NA       | NA | Nil           |
| 63 | 63 | Burn to R leg,<br>cholecystitis 1992,<br>pneumonia 1968,<br>appendicitis 1960 | Omeprazole                     | No | 15 years | NA | Nil           |
| 64 | 64 | No                                                                            | Nil                            | No | NA       | NA | Nil           |
| 65 | 65 | No                                                                            | Nil                            | No | NA       | NA | Nil           |
| 65 | 65 | No                                                                            | Multi vitamins                 | No | 30 years | <1 | Nil           |
| 66 | 40 | Dupuytren's<br>contracture L hand,<br>BPH                                     | Nil                            | No | NA       | NA | Nil           |
| 66 | 66 | No                                                                            | Nil                            | No | 23 years | NA | Nil           |
| 66 | 66 | No                                                                            | Nil                            | No | NA       | NA | Nil           |
| 66 | 66 | No                                                                            | Atorvastatin,<br>Ramipril 10mg | No | NA       | NA | Nil           |
| 67 | 67 | Asbestosis                                                                    | Multi vitamins                 | No | 45 years | <1 | Nil           |

|    |    |                                                 |                                      |    |          |        |     |
|----|----|-------------------------------------------------|--------------------------------------|----|----------|--------|-----|
| 67 | 67 | Cancer- right kidney (previously)               | Irbesartan                           | No | 40 years | 5      | Nil |
| 68 | 13 | No                                              | Multi vitamins                       | No | 40 years | Jan-04 | Nil |
| 68 | 36 | No                                              | Nil                                  | No | 35 years | 17     | Nil |
| 69 | 40 | No                                              | Nil                                  | No | NA       | NA     | Nil |
| 70 | 70 | No                                              | Nil                                  | No | NA       | NA     | Nil |
| 70 | 70 | SVT                                             | Prazosin, Multi vitamins             | No | NA       | NA     | Nil |
| 72 | 72 | Gout, prostate cancer (previously)              | Multi vitamins                       | No | 15 years | 10     | Nil |
| 72 | 10 | No                                              | Nil                                  | No | NA       | NA     | Nil |
| 72 | 72 | No                                              | Irbesartan, Prazosin, Multi vitamins | No | NA       | NA     | Nil |
| 73 | 73 | No                                              | Nil                                  | No | NA       | NA     | Nil |
| 73 | 37 | No                                              | Nil                                  | No | NA       | NA     | Nil |
| 73 | 73 | No                                              | Irbesartan, Atorvastatin, Amlodipine | No | 25 years | 10     | Nil |
| 73 | 73 | Gout                                            | Allopurinol, Multi vitamins          | No | NA       | NA     | Nil |
| 74 | 27 | No                                              | Nil                                  | No | 30 years | NA     | Nil |
| 75 | 75 | No                                              | Nil                                  | No | NA       | NA     | Nil |
| 75 | 29 | Eczema, diptheria as child                      | Nil                                  | No | NA       | NA     | Nil |
| 75 | 44 | No                                              | Nil                                  | No | NA       | NA     | Nil |
| 75 | 75 | No                                              | Ramipril, Atorvastatin               | No | NA       | NA     | Nil |
| 77 | 55 | BPH                                             | Perindopril, tamsulosin              | No | 30 years | 5      | Nil |
| 77 | 77 | No (cataract 07, diptheria 1934, tonsillectomy) | Nil                                  | No | NA       | NA     | Nil |

**Supplementary data table 1. Age, medication, smoking and skin cancer history of volunteers participating in the study**

| <b>Symbol</b> | <b>Fold Change</b> | <b>P.Value</b> |
|---------------|--------------------|----------------|
| CACNA1C       | 1.44               | 2.27E-06       |
| TMEM176B      | 1.55               | 4.06E-06       |
| CASQ2         | 1.94               | 6.90E-06       |
| THBS2         | 1.76               | 7.91E-06       |
| GALNTL2       | 2.21               | 1.13E-05       |
| NOX4          | 1.52               | 1.14E-05       |
| CLDN11        | 1.52               | 1.77E-05       |
| C3            | 2.06               | 2.01E-05       |
| ITGA8         | 1.92               | 3.25E-05       |
| CD163         | 1.85               | 4.67E-05       |
| LMO3          | 1.66               | 5.60E-05       |
| C2            | 1.38               | 5.97E-05       |
| TAGLN         | 1.69               | 6.65E-05       |
| CP            | 2.14               | 7.66E-05       |
| PTGIS         | 1.80               | 7.92E-05       |
| VIT           | 1.82               | 9.07E-05       |
| ACTA2         | 1.63               | 9.69E-05       |
| ABCA9         | 2.02               | 1.01E-04       |
| LEPR          | 1.87               | 1.24E-04       |
| ITK           | 1.36               | 1.35E-04       |
| PRSS12        | 1.41               | 1.37E-04       |
| STMN2         | 1.92               | 1.73E-04       |
| C1S           | 1.73               | 1.73E-04       |
| IL10RA        | 1.50               | 1.77E-04       |
| TNFAIP2       | 1.48               | 2.01E-04       |
| ALOX5AP       | 1.71               | 2.31E-04       |
| LAMA2         | 1.71               | 2.54E-04       |
| PRUNE2        | 1.59               | 2.69E-04       |
| SAMHD1        | 1.85               | 4.48E-04       |
| ACTC1         | 2.52               | 4.50E-04       |
| TLR4          | 1.58               | 4.77E-04       |
| MYOCD         | 1.71               | 5.21E-04       |
| MFAP4         | 1.90               | 5.25E-04       |
| GPR133        | 1.41               | 5.29E-04       |
| CD209         | 1.55               | 5.46E-04       |
| TMEM176A      | 1.53               | 5.55E-04       |
| SYT11         | 1.41               | 6.26E-04       |
| PCDHB3        | 1.51               | 6.52E-04       |
| RBPMS         | 1.41               | 6.87E-04       |
| LMOD1         | 1.45               | 6.92E-04       |
| RGL1          | 1.48               | 7.13E-04       |
| CPE           | 1.72               | 7.25E-04       |

|          |      |          |
|----------|------|----------|
| CD84     | 1.42 | 7.57E-04 |
| VSIG4    | 1.49 | 7.85E-04 |
| ALDH1B1  | 1.43 | 8.60E-04 |
| MS4A6A   | 1.60 | 8.70E-04 |
| MFAP5    | 2.16 | 9.01E-04 |
| RBMS3    | 1.59 | 9.22E-04 |
| ACTG2    | 1.92 | 9.61E-04 |
| RPL24    | 1.69 | 9.95E-04 |
| PDCD1LG2 | 1.63 | 9.98E-04 |
| NCKAP1L  | 1.49 | 1.03E-03 |
| SLIT3    | 1.61 | 1.13E-03 |
| FLNA     | 1.38 | 1.15E-03 |
| VCAM1    | 1.42 | 1.17E-03 |
| APOBEC3C | 1.51 | 1.18E-03 |
| TMEM71   | 1.51 | 1.24E-03 |
| GLIPR1   | 1.92 | 1.34E-03 |
| P2RX1    | 1.40 | 1.39E-03 |
| SRPX2    | 1.51 | 1.41E-03 |
| GRK5     | 1.29 | 1.43E-03 |
| PGM5     | 1.41 | 1.48E-03 |
| C7       | 1.63 | 1.54E-03 |
| PLEKHH2  | 1.59 | 1.56E-03 |
| TMOD1    | 1.31 | 1.68E-03 |
| SMOC2    | 1.62 | 1.69E-03 |
| FAT      | 1.49 | 1.82E-03 |
| LTBP2    | 1.34 | 1.83E-03 |
| KLF7     | 1.33 | 1.88E-03 |
| PRUNE2   | 1.66 | 1.89E-03 |
| GPC3     | 1.63 | 1.94E-03 |
| REEP3    | 1.64 | 1.96E-03 |
| FAM133B  | 1.52 | 2.06E-03 |
| FCGR2A   | 1.56 | 2.07E-03 |
| FAM69A   | 1.37 | 2.14E-03 |
| ENTPD1   | 1.48 | 2.26E-03 |
| LHFP     | 1.41 | 2.33E-03 |
| C1orf162 | 1.54 | 2.36E-03 |
| C10orf64 | 1.29 | 2.43E-03 |
| SLCO2B1  | 1.36 | 2.56E-03 |
| TMEM173  | 1.29 | 2.60E-03 |
| MX2      | 1.44 | 2.62E-03 |
| MYH11    | 1.69 | 2.84E-03 |
| SLC6A6   | 1.38 | 2.86E-03 |
| RNASE1   | 1.52 | 3.02E-03 |
| RGS5     | 1.84 | 3.08E-03 |
| DPYSL3   | 1.39 | 3.28E-03 |
| ISLR     | 1.65 | 3.29E-03 |
| KANK2    | 1.35 | 3.35E-03 |

|         |      |          |
|---------|------|----------|
| C1R     | 1.54 | 3.43E-03 |
| PCDHB16 | 1.51 | 3.45E-03 |
| CTGF    | 1.35 | 3.52E-03 |
| ELK3    | 1.35 | 3.57E-03 |
| ABCA6   | 1.69 | 3.58E-03 |
| CCL13   | 1.75 | 3.72E-03 |
| BHMT2   | 1.33 | 3.72E-03 |
| THBS1   | 1.66 | 3.97E-03 |
| PRRX1   | 1.52 | 4.01E-03 |
| CCR1    | 1.37 | 4.09E-03 |
| CFL2    | 1.52 | 4.23E-03 |
| COLEC12 | 1.33 | 4.29E-03 |
| FBLN5   | 1.58 | 4.38E-03 |
| PLSCR4  | 1.44 | 4.45E-03 |
| DOCK2   | 1.37 | 4.46E-03 |
| CMKLR1  | 1.31 | 4.52E-03 |
| FOLR2   | 1.43 | 4.57E-03 |
| PLEK    | 1.40 | 4.58E-03 |
| PLN     | 1.50 | 4.60E-03 |
| ST3GAL5 | 1.35 | 4.62E-03 |
| CSRP1   | 1.50 | 4.66E-03 |
| PTPRG   | 1.36 | 4.75E-03 |
| STAB1   | 1.35 | 4.83E-03 |
| MS4A4A  | 1.68 | 4.84E-03 |
| ALDH1A1 | 1.49 | 4.85E-03 |
| C1QA    | 1.43 | 4.94E-03 |
| IL7R    | 1.49 | 5.05E-03 |
| MMRN1   | 1.64 | 5.07E-03 |
| IRF8    | 1.37 | 5.11E-03 |
| CFH     | 1.82 | 5.22E-03 |
| CYBB    | 1.63 | 5.28E-03 |
| FAM70A  | 1.24 | 5.38E-03 |
| PRG4    | 2.30 | 5.42E-03 |
| CCBE1   | 1.40 | 5.43E-03 |
| SORBS1  | 1.40 | 5.50E-03 |
| UBLCP1  | 1.58 | 5.59E-03 |
| ITGA5   | 1.31 | 5.68E-03 |
| SPRED2  | 1.33 | 5.89E-03 |
| TNS1    | 1.40 | 5.91E-03 |
| TRIM22  | 1.62 | 6.05E-03 |
| MAOB    | 1.34 | 6.23E-03 |
| FHL1    | 1.43 | 6.28E-03 |
| AOX1    | 1.56 | 6.31E-03 |
| SPRY1   | 1.37 | 6.37E-03 |
| TGFBR1  | 1.39 | 6.39E-03 |
| CNN1    | 1.47 | 6.43E-03 |
| FCER1G  | 1.50 | 6.46E-03 |

|         |      |          |
|---------|------|----------|
| C1QTNF7 | 1.44 | 6.47E-03 |
| PDGFD   | 1.51 | 6.55E-03 |
| TGFBR2  | 1.43 | 6.59E-03 |
| ANK2    | 1.42 | 6.65E-03 |
| TBC1D2B | 1.40 | 6.70E-03 |
| HDC     | 1.36 | 6.80E-03 |
| PMP22   | 1.43 | 6.83E-03 |
| CILP    | 1.58 | 6.96E-03 |
| FPR3    | 1.37 | 7.11E-03 |
| DPYSL2  | 1.35 | 7.30E-03 |
| CHRD1   | 1.63 | 7.34E-03 |
| LAMC1   | 1.41 | 7.42E-03 |
| TFPI    | 1.44 | 7.45E-03 |
| LPP     | 1.35 | 7.56E-03 |
| PSD3    | 1.56 | 7.56E-03 |
| IGJ     | 2.88 | 7.71E-03 |
| TIMP3   | 1.36 | 7.81E-03 |
| RBPJ    | 1.31 | 7.92E-03 |
| ZNFX1   | 1.34 | 7.95E-03 |
| CDH11   | 1.31 | 8.24E-03 |
| NRP1    | 1.39 | 8.24E-03 |
| CD200R1 | 1.33 | 8.25E-03 |
| XPNPEP2 | 1.30 | 8.34E-03 |
| CYBRD1  | 1.43 | 8.54E-03 |
| SIPA1L2 | 1.31 | 8.66E-03 |
| TGFBR3  | 1.38 | 8.69E-03 |
| VCAN    | 1.55 | 8.77E-03 |
| MYLK    | 1.29 | 8.87E-03 |
| PSCD4   | 1.27 | 8.99E-03 |
| MOXD1   | 1.31 | 9.02E-03 |
| MAP1B   | 1.44 | 9.21E-03 |
| PDE3A   | 1.31 | 9.37E-03 |
| STEAP4  | 1.62 | 9.42E-03 |
| CTSO    | 1.39 | 9.44E-03 |
| EVI2B   | 1.53 | 9.54E-03 |
| COL12A1 | 1.57 | 9.59E-03 |
| CBLB    | 1.36 | 9.60E-03 |
| C1QC    | 1.45 | 9.83E-03 |

**Supplementary data table 2 – Genes upregulated in oldest versus youngest age groups (>70 vs 18-29 years)**



| Name                                               | GO Term Number | Enrichment(NES) | P.Value |
|----------------------------------------------------|----------------|-----------------|---------|
| Nuclear Part                                       | 0044428        | 4.11            | 0.00    |
| Intracellular Transport                            | 0046907        | 4.08            | 0.00    |
| Rna Binding                                        | 0003723        | 3.96            | 0.00    |
| Organelle Membrane                                 | 0031090        | 3.79            | 0.00    |
| Cellular Localization                              | 0051641        | 3.76            | 0.00    |
| Establishment Of Cellular Localization             | 0051234        | 3.72            | 0.00    |
| Mitochondrion                                      | 0005739        | 3.66            | 0.00    |
| Regulation Of Transcription                        | 0006355        | 3.58            | 0.00    |
| Membrane Enclosed Lumen                            | 0031974        | 3.58            | 0.00    |
| Organelle Lumen                                    | 0043233        | 3.54            | 0.00    |
| Transcription From Rna Polymerase Ii Promoter      | 0006368        | 3.49            | 0.00    |
| Nuclear Lumen                                      | 0031981        | 3.39            | 0.00    |
| Macromolecule Localization                         | 0033036        | 3.28            | 0.00    |
| Macromolecular Complex Assembly                    | 0065003        | 3.19            | 0.00    |
| Protein Localization                               | 0008104        | 3.18            | 0.00    |
| Cytoskeletal Protein Binding                       | 0008092        | 3.17            | 0.00    |
| Catabolic Process                                  | 0009056        | 3.17            | 0.00    |
| Organelle Envelope                                 | 0031967        | 3.16            | 0.00    |
| Regulation Of Rna Metabolic Process                | 0051252        | 3.16            | 0.00    |
| Negative Regulation Of Transcription               | 0045892        | 3.15            | 0.00    |
| Endoplasmic Reticulum                              | 0005783        | 3.14            | 0.00    |
| Cellular Component Assembly                        | 0022607        | 3.13            | 0.00    |
| Envelope                                           | 0005635        | 3.11            | 0.00    |
| Structural Constituent Of Ribosome                 | 0003735        | 3.1             | 0.00    |
| Negative Regulation Of Transcription Dna Dependent | 0045892        | 3.08            | 0.00    |
| Cellular Catabolic Process                         | 0044109        | 3.06            | 0.00    |
| Regulation Of Transcription dna Dependent          | 0006355        | 3.06            | 0.00    |
| Rna Processing                                     | 0006396        | 3.05            | 0.00    |
| Negative Regulation Of Rna Metabolic Process       | 0051253        | 3.05            | 0.00    |
| Golgi Apparatus                                    | 0005794        | 3.03            | 0.00    |
| Identical Protein Binding                          | 0042802        | 3.03            | 0.00    |
| Endomembrane System                                | 0012505        | 3               | 0.00    |
| Protein Transport                                  | 0015031        | 2.98            | 0.00    |
| Establishment Of Protein Localization              | 0045184        | 2.94            | 0.00    |
| Vesicle Mediated Transport                         | 0016192        | 2.93            | 0.00    |
| Organelle Organization And Biogenesis              | 0006996        | 2.92            | 0.00    |
| Translation                                        | 0006412        | 2.91            | 0.00    |
| Rna Splicing                                       | 0008380        | 2.86            | 0.00    |
| Protein Kinase Cascade                             | 0035556        | 2.84            | 0.00    |

|                                                                                            |         |      |      |
|--------------------------------------------------------------------------------------------|---------|------|------|
| Transferase Activity Transferring Phosphorus Containing Groups                             | 0016772 | 2.83 | 0.00 |
| Outer Membrane                                                                             | 0019867 | 2.82 | 0.00 |
| Biosynthetic Process                                                                       | 0009058 | 2.81 | 0.00 |
| Negative Regulation Of Nucleobase nucleoside nucleotide And Nucleic Acid Metabolic Process | 0045934 | 2.8  | 0.00 |
| Nucleoplasm                                                                                | 0005654 | 2.79 | 0.00 |
| Regulation Of Developmental Process                                                        | 0050793 | 2.78 | 0.00 |
| Programmed Cell Death                                                                      | 0012501 | 2.77 | 0.00 |
| Regulation Of Apoptosis                                                                    | 0042981 | 2.77 | 0.00 |
| Regulation Of Transcription From Rna Polymerase II Promoter                                | 0006357 | 2.77 | 0.00 |
| Apoptosis Go                                                                               | 0006915 | 2.72 | 0.00 |
| Organelle Outer Membrane                                                                   | 0031968 | 2.72 | 0.00 |
| Post Translational Protein Modification                                                    | 0043687 | 2.72 | 0.00 |
| Intracellular Protein Transport                                                            | 0006886 | 2.71 | 0.00 |
| Cellular Biosynthetic Process                                                              | 0044249 | 2.69 | 0.00 |
| Cytosol                                                                                    | 0005829 | 2.68 | 0.00 |
| Regulation Of Programmed Cell Death                                                        | 0043067 | 2.67 | 0.00 |
| Transcription Activator Activity                                                           | 0016563 | 2.67 | 0.00 |
| Negative Regulation Of Cellular Metabolic Process                                          | 0031324 | 2.67 | 0.00 |
| Transcription Cofactor Activity                                                            | 0003712 | 2.67 | 0.00 |
| Negative Regulation Of Metabolic Process                                                   | 0009892 | 2.66 | 0.00 |
| I-kappaB kinase/NF-kappaB signaling                                                        | 0007249 | 2.64 | 0.00 |
| Transcription Factor Binding                                                               | 0000989 | 2.63 | 0.00 |
| Organic Acid Metabolic Process                                                             | 0006082 | 2.6  | 0.00 |
| Phosphotransferase Activity Alcohol Group As Acceptor                                      | 0016773 | 2.6  | 0.00 |
| Kinase Activity                                                                            | 0016301 | 2.59 | 0.00 |
| Protein N Terminus Binding                                                                 | 0047485 | 2.59 | 0.00 |
| Carboxylic Acid Metabolic Process                                                          | 0019752 | 2.58 | 0.00 |
| Hydrolase Activity Acting On Acid Anhydrides                                               | 0016817 | 2.58 | 0.00 |
| Pyrophosphatase Activity                                                                   | 0016462 | 2.55 | 0.00 |
| Basement Membrane                                                                          | 0005604 | 2.54 | 0.00 |
| Phosphorylation                                                                            | 0016310 | 2.53 | 0.00 |
| Nucleoside Triphosphatase Activity                                                         | 0017111 | 2.52 | 0.00 |
| Cell Fraction                                                                              | 0000267 | 2.51 | 0.00 |
| Golgi Apparatus Part                                                                       | 0044431 | 2.5  | 0.00 |
| Regulation Of I Kappab Kinase Nf Kappab Cascade                                            | 0043122 | 2.5  | 0.00 |
| Protein Targeting                                                                          | 0006605 | 2.5  | 0.00 |
| Cytoskeleton                                                                               | 0005856 | 2.5  | 0.00 |

NES- normalised enrichment score (NES of 0 is no enrichment) **Supplementary data table 3 GSEA of positively enriched gene sets in oldest versus youngest age groups**

| Term                                                                  | GO Term Number | P.value  |
|-----------------------------------------------------------------------|----------------|----------|
| intracellular                                                         | 0005622        | 3.50E-38 |
| cell                                                                  | 0007049        | 4.80E-27 |
| biopolymer metabolic process                                          | 0043170        | 4.50E-25 |
| cellular macromolecule metabolic process                              | 0044260        | 8.50E-22 |
| ribonucleotide binding                                                | 0032553        | 2.80E-21 |
| ATP binding                                                           | 0005524        | 9.00E-21 |
| macromolecule metabolic process                                       | 0043170        | 9.10E-21 |
| adenyl ribonucleotide binding                                         | 0032559        | 3.80E-20 |
| nucleus                                                               | 0005634        | 5.30E-20 |
| purine nucleotide binding                                             | 0017076        | 1.80E-19 |
| nucleotide binding                                                    | 0000166        | 1.30E-18 |
| adenyl nucleotide binding                                             | 0030554        | 2.50E-18 |
| organelle                                                             | 0031090        | 4.20E-17 |
| nucleobase, nucleoside, nucleotide and nucleic acid metabolic process | 0055134        | 1.90E-15 |
| intracellular membrane-bounded organelle                              | 0043231        | 6.00E-14 |
| transferase activity, transferring phosphorus-containing groups       | 0016772        | 2.70E-13 |
| primary metabolic process                                             | 0044238        | 2.30E-12 |
| protein serine/threonine kinase activity                              | 0004674        | 2.30E-12 |
| nuclear part                                                          | 0044428        | 4.10E-12 |
| nucleic acid binding                                                  | 0003676        | 4.10E-12 |
| ubiquitin-dependent protein catabolic process                         | 0006511        | 1.00E-11 |
| modification-dependent protein catabolic process                      | 0019941        | 1.00E-11 |
| cellular biopolymer catabolic process                                 | 0044265        | 1.00E-11 |
| modification-dependent macromolecule catabolic process                | 0043632        | 1.00E-11 |
| cellular protein catabolic process                                    | 0044257        | 1.00E-11 |
| proteolysis involved in cellular protein catabolic process            | 0051603        | 1.00E-11 |
| protein catabolic process                                             | 0030163        | 1.90E-11 |
| nucleoplasm                                                           | 0005654        | 2.20E-11 |
| biopolymer catabolic process                                          | 0043285        | 3.70E-11 |
| zinc ion binding                                                      | 0008270        | 1.90E-10 |
| nuclear lumen                                                         | 0031981        | 2.70E-10 |
| protein modification process                                          | 0036211        | 3.20E-10 |
| ligase activity                                                       | 0016874        | 3.60E-10 |
| cellular metabolic process                                            | 0044237        | 4.40E-10 |
| RNA metabolic process                                                 | 0016070        | 5.70E-10 |
| biopolymer modification                                               | 0043412        | 9.70E-10 |
| phosphotransferase activity, alcohol group as acceptor                | 0016773        | 1.20E-09 |

|                                                |         |          |
|------------------------------------------------|---------|----------|
| kinase activity                                | 0016301 | 3.40E-09 |
| gene expression                                | 0010467 | 4.30E-09 |
| protein kinase activity                        | 0004672 | 4.50E-09 |
| intracellular organelle lumen                  | 0070013 | 5.10E-09 |
| post-translational protein modification        | 0043687 | 8.10E-09 |
| protein metabolic process                      | 0019538 | 8.30E-09 |
| cellular protein metabolic process             | 0044267 | 8.40E-09 |
| response to DNA damage stimulus                | 0006974 | 1.10E-08 |
| helicase activity                              | 0004386 | 2.30E-08 |
| catalytic activity                             | 0003824 | 2.50E-08 |
| organelle lumen                                | 0043233 | 2.60E-08 |
| DNA repair                                     | 0006281 | 3.20E-08 |
| membrane-enclosed lumen                        | 0031974 | 3.40E-08 |
| cellular response to DNA damage stimulus       | 0006974 | 4.70E-08 |
| macromolecule biosynthetic process             | 0009059 | 5.40E-08 |
| biopolymer biosynthetic process                | 0009059 | 5.70E-08 |
| cellular response to stress                    | 0033554 | 6.60E-08 |
| cellular macromolecule biosynthetic process    | 0034645 | 6.60E-08 |
| cellular macromolecule catabolic process       | 0044265 | 7.10E-08 |
| protein amino acid phosphorylation             | 0006468 | 7.80E-08 |
| ligase activity, forming carbon-nitrogen bonds | 0016879 | 8.50E-08 |
| macromolecule localization                     | 0033036 | 8.70E-08 |
| transition metal ion binding                   | 0046914 | 9.40E-08 |
| nucleoside-triphosphatase activity             | 0017111 | 1.10E-07 |
| acid-amino acid ligase activity                | 0016881 | 1.20E-07 |
| binding                                        | 0005488 | 1.30E-07 |
| protein complex                                | 0043234 | 1.90E-07 |
| hydrolase activity, acting on acid anhydrides  | 0016817 | 2.10E-07 |
| metabolic process                              | 0008152 | 2.40E-07 |
| pyrophosphatase activity                       | 0016462 | 2.80E-07 |
| organelle part                                 | 0044422 | 2.90E-07 |
| ubiquitin thiolesterase activity               | 0004221 | 2.90E-07 |
| macromolecule catabolic process                | 0009057 | 3.10E-07 |
| ubiquitin-protein ligase activity              | 0061630 | 3.20E-07 |
| protein localization                           | 0008104 | 9.00E-07 |
| protein transport                              | 0015031 | 1.40E-06 |
| establishment of protein localization          | 0045184 | 1.50E-06 |
| ATP-dependent helicase activity                | 0008026 | 1.50E-06 |
| GTPase activator activity                      | 0005096 | 2.00E-06 |
| cell cycle                                     | 0007049 | 2.30E-06 |
| nucleoplasm part                               | 0044451 | 2.90E-06 |

|                                                                                     |         |          |
|-------------------------------------------------------------------------------------|---------|----------|
| GTPase regulator activity                                                           | 0030695 | 2.90E-06 |
| cellular response to stimulus                                                       | 0051716 | 3.00E-06 |
| RNA binding                                                                         | 0003723 | 3.30E-06 |
| ATPase activity                                                                     | 0016887 | 3.30E-06 |
| Ubiquitin mediated proteolysis                                                      | 0043161 | 4.10E-06 |
| nucleobase, nucleoside, nucleotide and nucleic acid transport                       | 0015931 | 5.40E-06 |
| DNA metabolic process                                                               | 0006259 | 6.10E-06 |
| nucleic acid transport                                                              | 0050657 | 6.40E-06 |
| transcription                                                                       | 0003700 | 6.90E-06 |
| phosphate metabolic process                                                         | 0006796 | 7.10E-06 |
| hydrolase activity, acting on ester bonds                                           | 0016788 | 8.10E-06 |
| macromolecular complex                                                              | 0032991 | 9.90E-06 |
| hydrolase activity                                                                  | 0016787 | 1.20E-05 |
| transferase activity                                                                | 0016740 | 1.20E-05 |
| DNA binding                                                                         | 0003677 | 1.40E-05 |
| regulation of gene expression                                                       | 0010468 | 1.50E-05 |
| intracellular transport                                                             | 0046907 | 1.90E-05 |
| cellular process                                                                    | 0009987 | 2.00E-05 |
| chromosome organization                                                             | 0051276 | 2.10E-05 |
| DNA replication                                                                     | 0006260 | 2.60E-05 |
| cellular protein localization                                                       | 0034613 | 2.60E-05 |
| ATPase activity, coupled                                                            | 0042623 | 2.80E-05 |
| small conjugating protein ligase activity                                           | 0061659 | 2.90E-05 |
| intracellular protein transport                                                     | 0006886 | 3.00E-05 |
| microtubule organizing center                                                       | 0005815 | 3.30E-05 |
| thiolester hydrolase activity                                                       | 0016790 | 3.40E-05 |
| non-membrane-bounded organelle                                                      | 0043228 | 3.50E-05 |
| mRNA transport                                                                      | 0051028 | 3.60E-05 |
| nuclear pore                                                                        | 0005643 | 4.00E-05 |
| centrosome                                                                          | 0005813 | 4.40E-05 |
| cell division                                                                       | 0051301 | 4.50E-05 |
| regulation of macromolecule biosynthetic process                                    | 0010556 | 5.30E-05 |
| RNA Degredation                                                                     | 0000292 | 6.00E-05 |
| regulation of small GTPase mediated signal transduction                             | 0051056 | 6.70E-05 |
| RNA biosynthetic process                                                            | 0032774 | 6.70E-05 |
| RNA processing                                                                      | 0006396 | 7.30E-05 |
| phosphorylation                                                                     | 0016310 | 7.40E-05 |
| regulation of nucleobase, nucleoside, nucleotide and nucleic acid metabolic process | 0019219 | 7.60E-05 |
| cellular localization                                                               | 0051641 | 7.80E-05 |
| protein modification by small protein conjugation                                   | 0032446 | 8.60E-05 |

|                                                          |         |          |
|----------------------------------------------------------|---------|----------|
| cysteine-type peptidase activity                         | 0008234 | 8.80E-05 |
| organelle organization                                   | 0006996 | 9.10E-05 |
| microtubule cytoskeleton                                 | 0015630 | 9.90E-05 |
| mitotic cell cycle checkpoint                            | 0007093 | 1.00E-04 |
| cell cycle checkpoint                                    | 0000075 | 1.00E-04 |
| transcription initiation from RNA polymerase II promoter | 0006367 | 1.00E-04 |
| regulation of cellular biosynthetic process              | 0031326 | 1.00E-04 |
| regulation of biosynthetic process                       | 0009889 | 1.00E-04 |
| DNA-dependent DNA replication                            | 0006261 | 1.00E-04 |
| pore complex                                             | 0046930 | 1.00E-04 |
| metal ion binding                                        | 0046872 | 1.00E-04 |
| nucleotidyltransferase activity                          | 0016779 | 1.00E-04 |
| small GTPase regulator activity                          | 0030695 | 1.00E-04 |
| protein transporter activity                             | 0008565 | 1.00E-04 |
| DNA-directed DNA polymerase activity                     | 0003887 | 1.00E-04 |
| Cell cycle                                               | 0007049 | 1.60E-04 |
| T cell receptor signalling pathway                       | 0050852 | 1.10E-03 |
| MAPKinase Signaling Pathway                              | 0008349 | 3.60E-03 |

**Supplementary data table 4a GO of gene sets positively enriched in the 30-45 age group**

| <b>Term</b>                                           | <b>GO Term number</b> | <b>P.Value</b> |
|-------------------------------------------------------|-----------------------|----------------|
| multicellular organismal process                      | 0032501               | 3.00E-15       |
| sequence-specific DNA binding                         | 0043565               | 2.10E-13       |
| extracellular region                                  | 0005576               | 6.10E-12       |
| transcription factor activity                         | 0000989               | 3.10E-11       |
| anatomical structure morphogenesis                    | 0009653               | 2.70E-09       |
| system process                                        | 0003008               | 3.10E-09       |
| anatomical structure development                      | 0048856               | 3.80E-09       |
| developmental process                                 | 0032502               | 7.30E-09       |
| organ morphogenesis                                   | 0009887               | 1.20E-08       |
| system development                                    | 0048731               | 1.30E-08       |
| transcription regulator activity                      | 0030528               | 2.10E-08       |
| neuron differentiation                                | 0030182               | 2.50E-08       |
| multicellular organismal development                  | 0007275               | 2.80E-08       |
| neurogenesis                                          | 0022008               | 3.40E-08       |
| organ development                                     | 0048799               | 5.80E-08       |
| generation of neurons                                 | 0048699               | 7.00E-08       |
| G-protein coupled receptor protein signaling pathway  | 0007186               | 1.10E-07       |
| cell surface receptor linked signal transduction      | 0007166               | 1.40E-07       |
| cell development                                      | 0048468               | 2.50E-07       |
| cell fate commitment                                  | 0045165               | 4.40E-07       |
| voltage-gated ion channel activity                    | 0005244               | 6.90E-07       |
| voltage-gated channel activity                        | 0022832               | 6.90E-07       |
| embryonic development ending in birth or egg hatching | 0009792               | 7.50E-07       |
| neurological system process                           | 0050877               | 9.10E-07       |
| cellular developmental process                        | 0048869               | 1.00E-06       |
| hormone activity                                      | 0005179               | 1.00E-06       |
| cell differentiation                                  | 0030154               | 1.10E-06       |
| substrate specific channel activity                   | 0022838               | 1.60E-06       |
| ion channel activity                                  | 0005216               | 2.30E-06       |
| regulation of developmental process                   | 0050793               | 2.50E-06       |
| sensory organ development                             | 0007423               | 2.60E-06       |
| extracellular region part                             | 0044421               | 2.70E-06       |
| chordate embryonic development                        | 0043009               | 2.90E-06       |
| regulation of biological process                      | 0050789               | 3.20E-06       |
| embryonic skeletal system development                 | 0048706               | 3.40E-06       |
| regulation of growth                                  | 0001558               | 3.40E-06       |
| axonogenesis                                          | 0007409               | 3.60E-06       |
| gated channel activity                                | 0005244               | 4.10E-06       |

|                                                                                     |         |          |
|-------------------------------------------------------------------------------------|---------|----------|
| positive regulation of biological process                                           | 0048518 | 4.60E-06 |
| nervous system development                                                          | 0007399 | 5.50E-06 |
| neurite morphogenesis                                                               | 0048812 | 6.60E-06 |
| G-protein coupled receptor activity                                                 | 0004930 | 8.60E-06 |
| cell morphogenesis involved in neuron differentiation                               | 0048667 | 8.70E-06 |
| embryonic skeletal system morphogenesis                                             | 0048704 | 1.20E-05 |
| neuron development                                                                  | 0048666 | 1.20E-05 |
| embryonic development                                                               | 0009790 | 1.20E-05 |
| potassium ion binding                                                               | 0030955 | 1.20E-05 |
| cell projection morphogenesis                                                       | 0048858 | 1.50E-05 |
| neuropeptide signaling pathway                                                      | 0007218 | 1.60E-05 |
| regulation of nervous system development                                            | 0051960 | 1.60E-05 |
| biological regulation                                                               | 0051960 | 1.70E-05 |
| growth                                                                              | 0040007 | 1.90E-05 |
| cell morphogenesis involved in differentiation                                      | 0000904 | 2.00E-05 |
| regulation of transcription from RNA polymerase II promoter                         | 0006357 | 2.00E-05 |
| neuron fate commitment                                                              | 0048663 | 2.40E-05 |
| potassium channel activity                                                          | 0005267 | 2.70E-05 |
| neurite development                                                                 | 0031175 | 2.90E-05 |
| positive regulation of cellular process                                             | 0048522 | 3.00E-05 |
| regulation of cellular process                                                      | 0050794 | 3.00E-05 |
| regulation of cellular biosynthetic process                                         | 0031326 | 3.20E-05 |
| cell-cell signaling                                                                 | 0007267 | 4.40E-05 |
| positive regulation of developmental process                                        | 0051094 | 6.70E-05 |
| regulation of cell development                                                      | 0060284 | 7.30E-05 |
| regulation of nucleobase, nucleoside, nucleotide and nucleic acid metabolic process | 0019219 | 7.60E-05 |
| alkali metal ion binding                                                            | 0031420 | 7.60E-05 |
| embryonic morphogenesis                                                             | 0048598 | 8.50E-05 |
| regulation of neuron differentiation                                                | 0045664 | 9.00E-05 |
| skeletal system morphogenesis                                                       | 0048705 | 1.00E-04 |
| cation channel activity                                                             | 0005261 | 1.00E-04 |
| neuropeptide receptor activity                                                      | 0008188 | 1.00E-04 |
| Chondroitin sulfate biosynthesis                                                    | 0030206 | 3.10E-03 |

**Supplementary data table 4b GO of gene sets negatively enriched in the 30-45 age group**



| NAME                                                              | NES   | NOM p-val |
|-------------------------------------------------------------------|-------|-----------|
| KEGG_MTOR_SIGNALING_PATHWAY                                       | 3.98  | 0.00      |
| BIOPOLYMER_METABOLIC_PROCESS                                      | 3.98  | 0.00      |
| ORGANELLE_PART                                                    | 3.48  | 0.00      |
| INTRACELLULAR_ORGANELLE_PART                                      | 3.43  | 0.00      |
| REACTOME_CELL_CYCLE_MITOTIC                                       | 3.26  | 0.00      |
| NUCLEUS                                                           | 3.09  | 0.00      |
| MICROTUBULE_CYTOSKELETON                                          | 2.96  | 0.00      |
| PROTEIN_SERINE_THREONINE_KINASE_ACTIVITY                          | 2.94  | 0.00      |
| TRANSFERASE_ACTIVITY_TRANSFERRING_PHOSPHORUS_CONTAINING_GROUPS    | 2.81  | 0.00      |
| CHR4Q31                                                           | 2.79  | 0.00      |
| NUCLEOPLASM                                                       | 2.72  | 0.00      |
| NUCLEAR_PART                                                      | 2.72  | 0.00      |
| PROTEIN_MODIFICATION_PROCESS                                      | 2.60  | 0.00      |
| BIOPOLYMER_MODIFICATION                                           | 2.59  | 0.00      |
| NUCLEOBASENUCLEOSIDENUCLEOTIDE_AND_NUCLEIC_ACID_METABOLIC_PROCESS | 2.58  | 0.00      |
| MICROTUBULE_ORGANIZING_CENTER                                     | 2.56  | 0.00      |
| CHR1P22                                                           | 2.56  | 0.00      |
| REACTOME_LATE_PHASE_OF_HIV_LIFE_CYCLE                             | 2.56  | 0.00      |
| DNA_METABOLIC_PROCESS                                             | 2.51  | 0.00      |
| RECEPTOR_ACTIVITY                                                 | -2.51 | 0.000     |
| OXIDOREDUCTASE_ACTIVITY_ACTING_ON_CH_OH_GROUP_OF_DONORS           | -2.53 | 0.000     |
| INTEGRAL_TO_PLASMA_MEMBRANE                                       | -2.63 | 0.000     |
| CHR11Q12                                                          | -2.64 | 0.000     |
| G_PROTEIN_COUPLED_RECEPTOR_ACTIVITY                               | -2.69 | 0.000     |
| TGFBETA EARLY UP                                                  | -2.70 | 0.000     |
| INTRINSIC_TO_PLASMA_MEMBRANE                                      | -2.72 | 0.000     |
| MULTICELLULAR_ORGANISMAL_DEVELOPMENT                              | -2.78 | 0.000     |
| REACTOME_RNA_POLYMERASE_I_PROMOTER_OPENING                        | -2.80 | 0.000     |
| SYSTEM_PROCESS                                                    | -2.81 | 0.000     |
| SYSTEM_DEVELOPMENT                                                | -2.82 | 0.000     |
| REACTOME_PACKAGING_OF_TELOMERE_ENDS                               | -2.83 | 0.000     |
| ANATOMICAL_STRUCTURE_DEVELOPMENT                                  | -2.85 | 0.000     |
| CELL_CELL_SIGNALING                                               | -2.86 | 0.000     |
| PLASMA_MEMBRANE_PART                                              | -2.89 | 0.000     |
| KEGG_NEUROACTIVE_LIGAND_RECEPTOR_INTERACTION                      | -2.97 | 0.000     |
| CHR17Q25                                                          | -3.01 | 0.000     |
| REACTOME_PEPTIDE_LIGAND_BINDING_RECEPTORS                         | -3.02 | 0.000     |
| REACTOME_G_ALPHA_I_SIGNALLING_EVENTS                              | -3.02 | 0.000     |
| REACTOME_DOWNSTREAM_EVENTS_IN_GPCR_SIGNALING                      | -3.03 | 0.000     |
| CHR16P11                                                          | -3.04 | 0.000     |
| CHR1P36                                                           | -3.05 | 0.000     |

|                                                      |       |       |
|------------------------------------------------------|-------|-------|
| KEGG_SYSTEMIC_LUPUS_ERYTHEMATOSUS                    | -3.06 | 0.000 |
| CHR16P13                                             | -3.08 | 0.000 |
| RHODOPSIN_LIKE_RECEPTOR_ACTIVITY                     | -3.10 | 0.000 |
| EXTRACELLULAR_SPACE                                  | -3.12 | 0.000 |
| G_PROTEIN_COUPLED_RECEPTOR_PROTEIN_SIGNALING_PATHWAY | -3.12 | 0.000 |
| PLASMA_MEMBRANE                                      | -3.20 | 0.000 |
| CHR17P13                                             | -3.49 | 0.000 |
| CHR11Q13                                             | -3.76 | 0.000 |
| EXTRACELLULAR_REGION_PART                            | -3.79 | 0.000 |
| REACTOME_CLASS_A1_RHODOPSIN_LIKE_RECEPTORS           | -3.85 | 0.000 |
| OXIDOREDUCTASE_ACTIVITY                              | -3.88 | 0.000 |
| EXTRACELLULAR_REGION                                 | -4.04 | 0.000 |
| CHR19Q13                                             | -4.16 | 0.000 |
| REACTOME_GPCR_LIGAND_BINDING                         | -4.60 | 0.000 |
| CHR19P13                                             | -4.83 | 0.000 |
| KEGG_OLFACTORY_TRANSDUCTION                          | -5.67 | 0.000 |
| REACTOME_OLFACTORY_SIGNALING_PATHWAY                 | -5.81 | 0.000 |

**Supplementary data Table 4c GSEA of gene sets positively and negatively enriched in the 30-45 age group**

|                                                                 |          |     |
|-----------------------------------------------------------------|----------|-----|
| Cadmium Ion Binding                                             | 9.40E-11 | 200 |
| Antigen Processing And Presentation Of Peptide Via Mhc Class Ii | 1.40E-05 | 36  |
| Immune System Process                                           | 3.20E-05 | 2.8 |
| Copper Ion Binding                                              | 3.60E-05 | 11  |
| Basal Part Of Cell                                              | 5.90E-05 | 23  |
| IgG Binding                                                     | 6.00E-05 | 58  |
| Endopeptidase Inhibitor Activity                                | 6.30E-05 | 6.5 |
| B Cell Mediated Immunity                                        | 6.70E-05 | 9.8 |
| Peptidase Inhibitor Activity                                    | 9.20E-05 | 6.2 |
| Response To Muscle Activity                                     | 1.30E-04 | Inf |
| Mhc Class Ii Protein Complex                                    | 1.30E-04 | 42  |
| Myeloid Cell Differentiation                                    | 1.50E-04 | 5.7 |
| Inflammatory Response                                           | 2.10E-04 | 3.7 |
| Response To Wounding                                            | 2.20E-04 | 3.2 |
| Enzyme Inhibitor Activity                                       | 2.40E-04 | 4.3 |
| Acute Inflammatory Response                                     | 2.80E-04 | 7.4 |
| Antigen Processing And Presentation                             | 3.10E-04 | 9.5 |
| Immune Response                                                 | 3.20E-04 | 2.7 |
| Hemidesmosome                                                   | 3.20E-04 | 190 |
| Immunoglobulin Receptor Activity                                | 3.20E-04 | 190 |
| Cell Differentiation                                            | 3.70E-04 | 2.2 |
| Pattern Recognition Receptor Activity                           | 3.70E-04 | 26  |
| Cellular Developmental Process                                  | 4.00E-04 | 2.2 |
| Regulation Of Cell Differentiation                              | 4.30E-04 | 3.4 |
| T Cell Selection                                                | 4.60E-04 | 24  |
| Immunoglobulin Binding                                          | 4.60E-04 | 24  |
| Lymphocyte Mediated Immunity                                    | 5.20E-04 | 6.5 |
| Hematopoiesis                                                   | 5.50E-04 | 3.8 |
| Immunoglobulin Mediated Immune Response                         | 5.60E-04 | 8.2 |
| Regulation Of Immune System Process                             | 5.60E-04 | 3.6 |
| Response To Biotic Stimulus                                     | 7.10E-04 | 3.4 |
| Regulation Of Developmental Process                             | 8.00E-04 | 2.3 |
| Basal Plasma Membrane                                           | 8.00E-04 | 19  |
| Mhc Protein Binding                                             | 8.00E-04 | 19  |
| Adaptive Immune Response                                        | 8.20E-04 | 5.9 |
| Response To Other Organism                                      | 8.70E-04 | 3.9 |
| Hemopoietic Or Lymphoid Organ Development                       | 9.40E-04 | 3.6 |

**Supplementary data table 5a GO of transcripts changing across the lifespan using a regression analysis**

| NAME                                                        | NES  | NOM p-val |
|-------------------------------------------------------------|------|-----------|
| NUCLEAR_PART                                                | 4.64 | 0.000     |
| PROGRAMMED_CELL_DEATH                                       | 4.56 | 0.000     |
| REGULATION_OF_TRANSCRIPTION                                 | 4.49 | 0.000     |
| APOPTOSIS_GO                                                | 4.48 | 0.000     |
| STRUCTURAL_CONSTITUENT_OF_RIBOSOME                          | 4.44 | 0.000     |
| TRANSCRIPTION_FROM_RNA_POLYMERASE_II_PROMOTER               | 4.43 | 0.000     |
| RNA_BINDING                                                 | 4.37 | 0.000     |
| ORGANELLE_MEMBRANE                                          | 4.36 | 0.000     |
| REGULATION_OF_PROGRAMMED_CELL_DEATH                         | 4.14 | 0.000     |
| OXIDOREDUCTASE_ACTIVITY                                     | 4.10 | 0.000     |
| MITOCHONDRION                                               | 4.09 | 0.000     |
| STRUCTURAL_MOLECULE_ACTIVITY                                | 4.07 | 0.000     |
| REGULATION_OF_APOPTOSIS                                     | 4.06 | 0.000     |
| EXTRACELLULAR_REGION                                        | 3.97 | 0.000     |
| CELLULAR_LOCALIZATION                                       | 3.92 | 0.000     |
| INTRACELLULAR_TRANSPORT                                     | 3.92 | 0.000     |
| REGULATION_OF_RNA_METABOLIC_PROCESS                         | 3.90 | 0.000     |
| ORGANELLE_LUMEN                                             | 3.89 | 0.000     |
| MEMBRANE_ENCLOSED_LUMEN                                     | 3.87 | 0.000     |
| ESTABLISHMENT_OF_CELLULAR_LOCALIZATION                      | 3.86 | 0.000     |
| NEGATIVE_REGULATE_CELLULAR_METABOLIC_PROCESS                | 3.84 | 0.000     |
| REGULATION_OF_DEVELOPMENTAL_PROCESS                         | 3.83 | 0.000     |
| EXTRACELLULAR_REGION_PART                                   | 3.80 | 0.000     |
| NEGATIVE_REGULATION_OF_METABOLIC_PROCESS                    | 3.79 | 0.000     |
| NUCLEAR_LUMEN                                               | 3.78 | 0.000     |
| BIOSYNTHETIC_PROCESS                                        | 3.78 | 0.000     |
| REGULATION_OF_TRANSCRIPTIONDNA_DEPENDENT                    | 3.76 | 0.000     |
| CELL_PROLIFERATION_GO_0008283                               | 3.74 | 0.000     |
| IDENTICAL_PROTEIN_BINDING                                   | 3.74 | 0.000     |
| ORGANELLE_ORGANIZATION_AND_BIOGENESIS                       | 3.72 | 0.000     |
| REGULATION_OF_BIOLOGICAL_QUALITY                            | 3.72 | 0.000     |
| VESICLE_MEDIATED_TRANSPORT                                  | 3.70 | 0.000     |
| ENDOMEMBRANE_SYSTEM                                         | 3.66 | 0.000     |
| CELLULAR_BIOSYNTHETIC_PROCESS                               | 3.63 | 0.000     |
| REGULATION_OF_TRANSCRIPTION_FROM_RNA_POLYMERASE_II_PROMOTER | 3.63 | 0.000     |
| MACROMOLECULAR_COMPLEX_ASSEMBLY                             | 3.62 | 0.000     |
| IMMUNE_SYSTEM_PROCESS                                       | 3.62 | 0.000     |
| NEGATIVE_REGULATION_OF_TRANSCRIPTION                        | 3.62 | 0.000     |
| PROTEIN_KINASE_CASCADE                                      | 3.60 | 0.000     |
| NEGATIVE_REGULATION_OF_APOPTOSIS                            | 3.56 | 0.000     |
| NEGATIVE_REGULATION_OF_PROGRAMMED_CELL_DEATH                | 3.55 | 0.000     |

|                                                                                              |      |       |
|----------------------------------------------------------------------------------------------|------|-------|
| CELLULAR_COMPONENT_ASSEMBLY                                                                  | 3.54 | 0.000 |
| CELLULAR_LIPID_METABOLIC_PROCESS                                                             | 3.54 | 0.000 |
| REGULATION_OF_SIGNAL_TRANSDUCTION                                                            | 3.52 | 0.000 |
| ANTI_APOPTOSIS                                                                               | 3.48 | 0.000 |
| REGULATION_OF_CELL_PROLIFERATION                                                             | 3.45 | 0.000 |
| ENDOPLASMIC_RETICULUM                                                                        | 3.43 | 0.000 |
| CELL_FRACTION                                                                                | 3.43 | 0.000 |
| NEGATIVE_REGULATION_OF_NUCLEOBASENUCLEOSIDENUCL<br>EOTIDE_AND_NUCLEIC_ACID_METABOLIC_PROCESS | 3.42 | 0.000 |
| TRANSLATION                                                                                  | 3.40 | 0.000 |
| MACROMOLECULE_LOCALIZATION                                                                   | 3.38 | 0.000 |
| ENZYME_REGULATOR_ACTIVITY                                                                    | 3.38 | 0.000 |
| TRANSCRIPTION_FACTOR_BINDING                                                                 | 3.36 | 0.000 |
| ORGANELLE_ENVELOPE                                                                           | 3.35 | 0.000 |
| IMMUNE_RESPONSE                                                                              | 3.34 | 0.000 |
| NUCLEOPLASM                                                                                  | 3.34 | 0.000 |
| PROTEINACEOUS_EXTRACELLULAR_MATRIX                                                           | 3.31 | 0.000 |
| EXTRACELLULAR_MATRIX                                                                         | 3.31 | 0.000 |
| RNA_PROCESSING                                                                               | 3.30 | 0.000 |
| NEGATIVE_REGULATION_OF_DEVELOPMENTAL_PROCESS                                                 | 3.26 | 0.000 |
| MACROMOLECULE_BIOSYNTHETIC_PROCESS                                                           | 3.23 | 0.000 |
| LIPID_METABOLIC_PROCESS                                                                      | 3.22 | 0.000 |
| ENVELOPE                                                                                     | 3.21 | 0.000 |
| ORGANIC_ACID_METABOLIC_PROCESS                                                               | 3.20 | 0.000 |
| EXCRETION                                                                                    | 3.19 | 0.000 |
| MEMBRANE_FRACTION                                                                            | 3.14 | 0.000 |
| RNA_POLYMERASE_II_TRANSCRIPTION_FACTOR_ACTIVITY                                              | 3.14 | 0.000 |
| MULTI_ORGANISM_PROCESS                                                                       | 3.13 | 0.000 |
| CARBOXYLIC_ACID_METABOLIC_PROCESS                                                            | 3.13 | 0.000 |
| I_KAPPAB_KINASE_NF_KAPPAB_CASCADE                                                            | 3.12 | 0.000 |
| TRANSCRIPTION_COFACTOR_ACTIVITY                                                              | 3.12 | 0.000 |
| CYTOSOL                                                                                      | 3.11 | 0.000 |
| REGULATION_OF_MOLECULAR_FUNCTION                                                             | 3.10 | 0.000 |
| CYTOSKELETON                                                                                 | 3.07 | 0.000 |
| PROTEIN_LOCALIZATION                                                                         | 3.06 | 0.000 |
| RESPONSE_TO_STRESS                                                                           | 3.06 | 0.000 |
| POST_TRANSLATIONAL_PROTEIN_MODIFICATION                                                      | 3.06 | 0.000 |
| PROTEIN_BINDING_BRIDGING                                                                     | 3.05 | 0.000 |
| POSITIVE_REGULATION_OF_SIGNAL_TRANSDUCTION                                                   | 3.04 | 0.000 |
| CYTOSKELETAL_PROTEIN_BINDING                                                                 | 3.01 | 0.000 |
| GTPASE_REGULATOR_ACTIVITY                                                                    | 3.01 | 0.000 |
| REGULATION_OF_I_KAPPAB_KINASE_NF_KAPPAB_CASCADE                                              | 3.00 | 0.000 |

**Supplementary data table 5b. Gene Set Enrichment Analysis upregulated with increasing age using a regression analysis**
